# Supplementary material for: p-Terphenyl and Diphenyl Ether Derivatives from the Marine-Derived Fungus Aspergillus candidus HM5-4
Source: MDPI journal article supplement (doi:10.3390/md22010013), 2023-12-24
Supplement: s1 [file s1]

## Supporting Information

### ***p*-Terphenyl and Diphenyl Ether Derivatives from Marine-Derived Fungus *Aspergillus candidus* HM5-4**

Yanbo Zeng<sup>1,2,5,†,\*</sup>, Shirong Wang<sup>1,2,†</sup>, Hanyang Peng<sup>1,3</sup>, Weibo Zhao<sup>1,4</sup>, Wenjun Chang<sup>1,5</sup>, Hao Wang<sup>1</sup>, Huiqin Chen<sup>1</sup>, and Haofu Dai<sup>1,\*</sup>

<sup>1</sup> *Hainan Provincial Key Laboratory for Functional Components Research and Utilization of Marine Bio-resources, Institute of Tropical Bioscience and Biotechnology, Chinese Academy of Tropical Agricultural Sciences & Key Laboratory for Biology and Genetic Resources of Tropical Crops of Hainan Province, Hainan Institute for Tropical Agricultural Resources, Haikou 571101, China; 13011987121@163.com (S.W.); 17379935106@163.com (H.P.); zwb1175642690@163.com (W.Z.); changwenjun@itbb.org.cn (W.C.); wanghao@itbb.org.cn (H.W.); chenhuiqin@itbb.org.cn (H.C.)*

<sup>2</sup> *Ocean College of Hebei Agricultural University, Qinhuangdao 066000, China*

<sup>3</sup> *Jiangsu Key Laboratory for Functional Substances of Chinese Medicine, Nanjing University of Chinese Medicine, Nanjing 210023, China*

<sup>4</sup> *Beijing Key Laboratory for Separation and Analysis in Biomedicine and Pharmaceuticals, School of Life Science, Beijing Institute of Technology, Beijing, 100081, China*

<sup>5</sup> *Zhanjiang Experimental Station of Chinese Academy of Tropical Agricultural Sciences, Zhanjiang, 524013, China*

\* Correspondence: zengyanbo@itbb.org.cn (Y.Z.); daihaofu@itbb.org.cn (H.D.)

† These authors contributed equally to this work.

Figure S1.  $^1\text{H}$  NMR (500 MHz,  $\text{DMSO-}d_6$ ) spectrum of compound **1**

Figure S2.  $^{13}\text{C}$  NMR (125 MHz,  $\text{DMSO-}d_6$ ) spectrum of compound **1**

Figure S3. DEPT135 spectrum of compound **1**

Figure S4. HSQC spectrum of compound **1**

Figure S5. HMBC spectrum of compound **1**

Figure S6.  $^1\text{H-}^1\text{H}$  COSY spectrum of compound **1**

Figure S7. ROESY spectrum of compound **1**

Figure S8. The HRESIMS spectrum of compound **1**

Figure S9. UV spectrum of compound **1**

Figure S10. IR spectrum of compound **1**

Figure S11.  $^1\text{H}$  NMR (500 MHz,  $\text{DMSO-}d_6$ ) spectrum of compound **2**

Figure S12.  $^{13}\text{C}$  NMR (125 MHz,  $\text{DMSO-}d_6$ ) spectrum of compound **2**

Figure S13. DEPT135 spectrum of compound **2**

Figure S14. HSQC spectrum of compound **2**

Figure S15. HMBC spectrum of compound **2**

Figure S16.  $^1\text{H-}^1\text{H}$  COSY spectrum of compound **2**

Figure S17. ROESY spectrum of compound **2**

Figure S18. The HRESIMS spectrum of compound **2**

Figure S19. UV spectrum of compound **2**

Figure S20. IR spectrum of compound **2**

Figure S21.  $^1\text{H}$  NMR (500 MHz,  $\text{DMSO-}d_6$ ) spectrum of compound **3**

Figure S22.  $^{13}\text{C}$  NMR (125 MHz,  $\text{DMSO-}d_6$ ) spectrum of compound **3**

Figure S23. DEPT135 spectrum of compound **3**

Figure S24. HSQC spectrum of compound **3**

Figure S25. HMBC spectrum of compound **3**

Figure S26.  $^1\text{H-}^1\text{H}$  COSY spectrum of compound **3**

Figure S27. ROESY spectrum of compound **3**

Figure S28. The HRESIMS spectrum of compound **3**

Figure S29. UV spectrum of compound **3**

Figure S30. IR spectrum of compound **3**

Figure S31.  $^1\text{H}$  NMR (600 MHz,  $\text{acetone-}d_6$ ) spectrum of compound **4**

Figure S32.  $^{13}\text{C}$  NMR (150 MHz,  $\text{acetone-}d_6$ ) spectrum of compound **4**

Figure S33. DEPT135 spectrum of compound **4**

Figure S34. HSQC spectrum of compound **4**

Figure S35. HMBC spectrum of compound **4**

Figure S36.  $^1\text{H}$ - $^1\text{H}$  COSY spectrum of compound **4**

Figure S37. ROESY spectrum of compound **4**

Figure S38. The HRESIMS spectrum of compound **4**

Figure S39. UV spectrum of compound **4**

Figure S40. IR spectrum of compound **4**

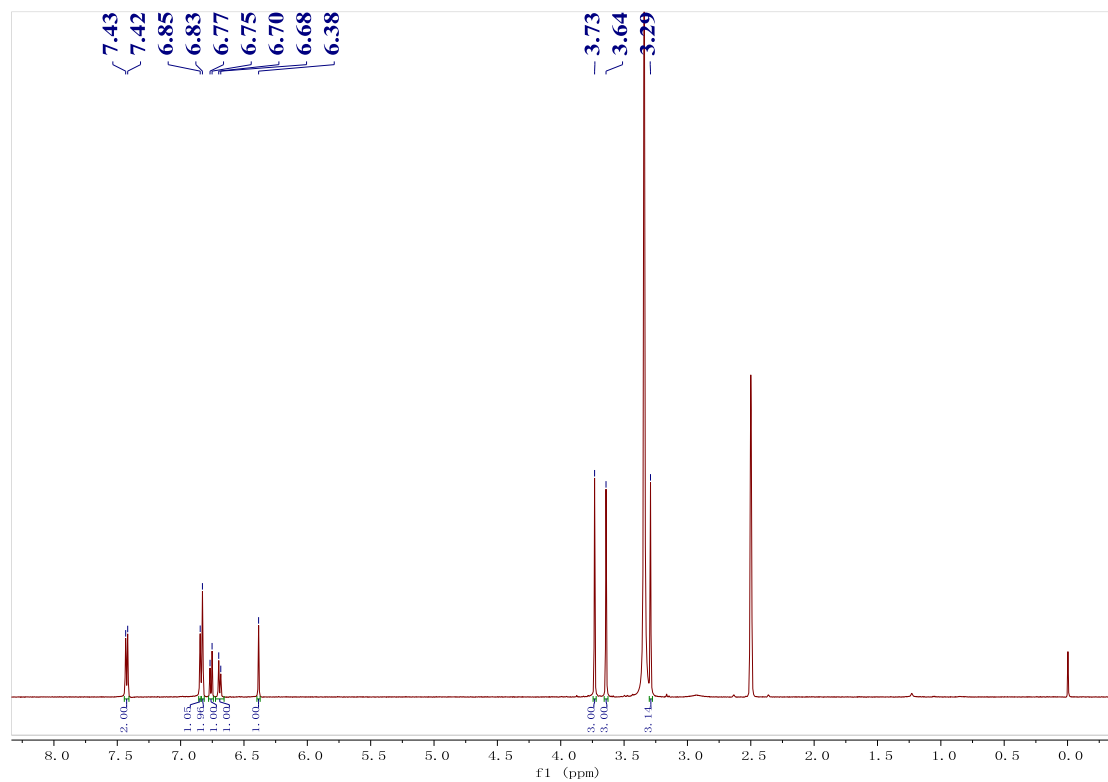

Figure S1. <sup>1</sup>H NMR (500 MHz, DMSO-*d*<sub>6</sub>) spectrum of compound **1**

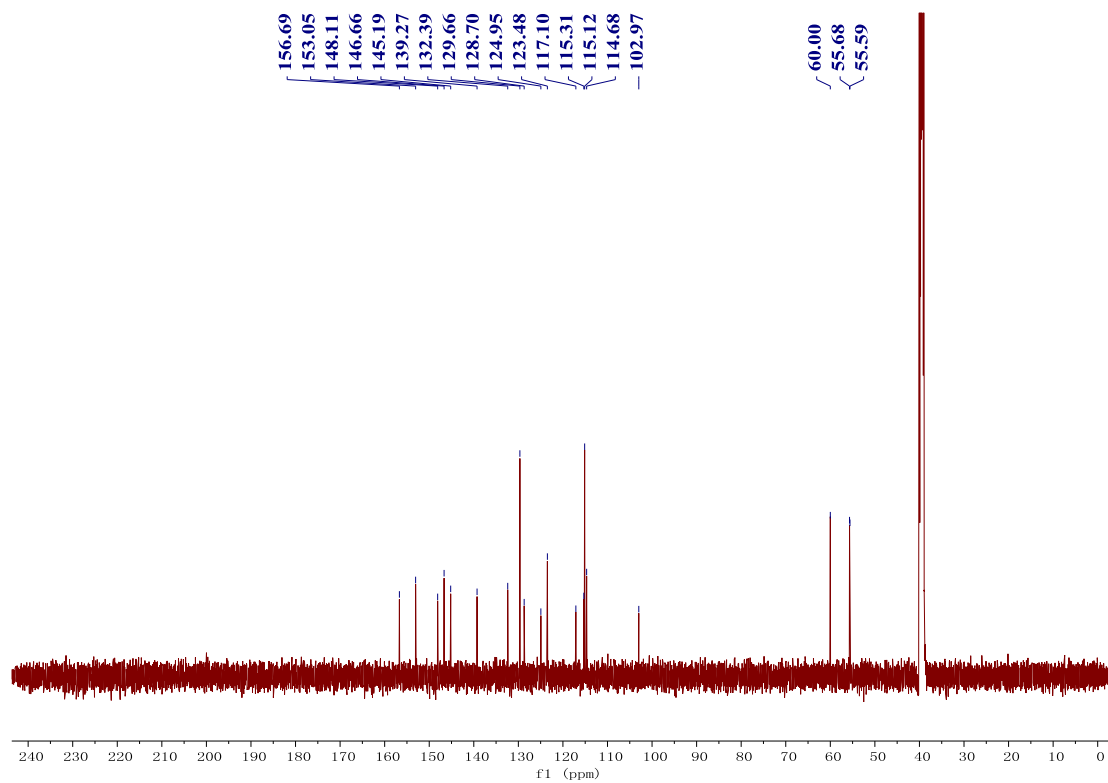

Figure S2. <sup>13</sup>C NMR (125 MHz, DMSO-*d*<sub>6</sub>) spectrum of compound **1**

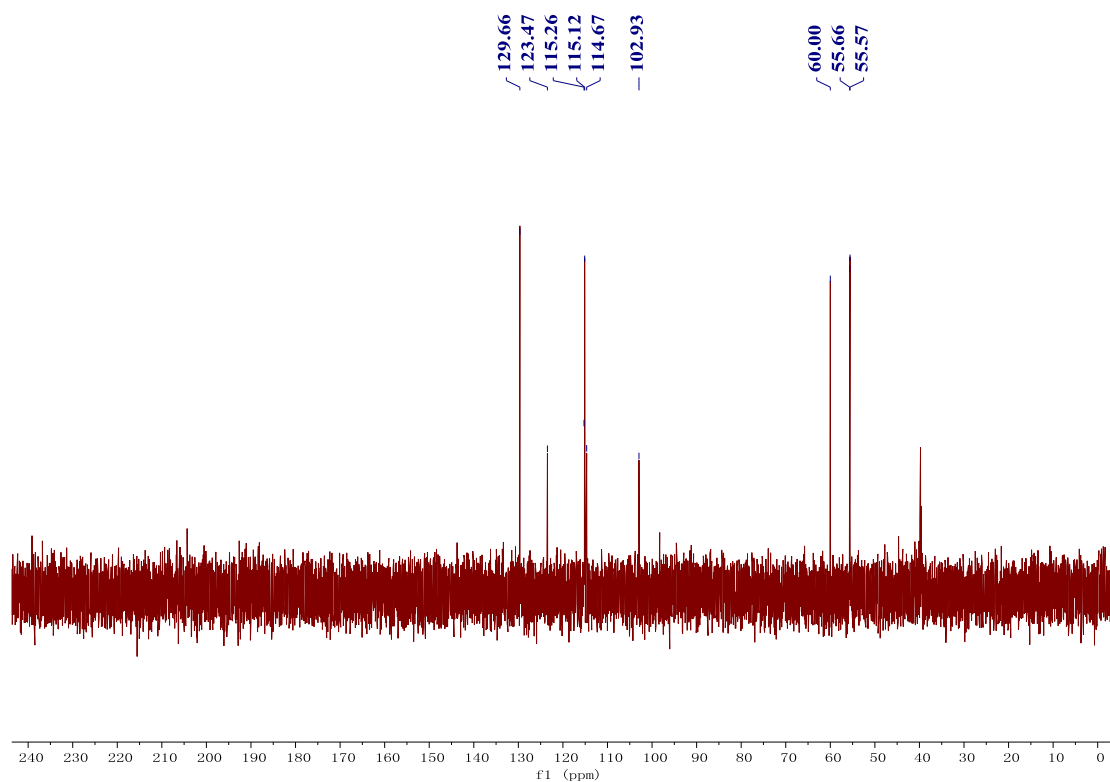

Figure S3. DEPT135 spectrum of compound **1**

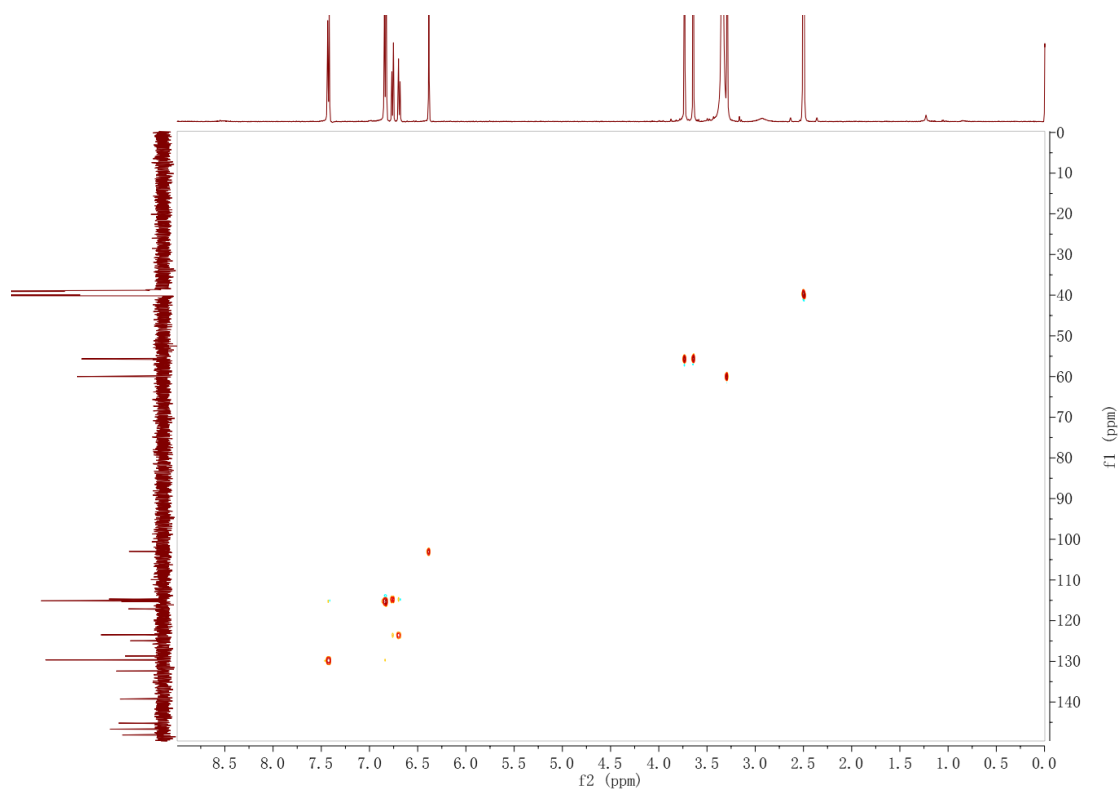

Figure S4. HSQC spectrum of compound **1**

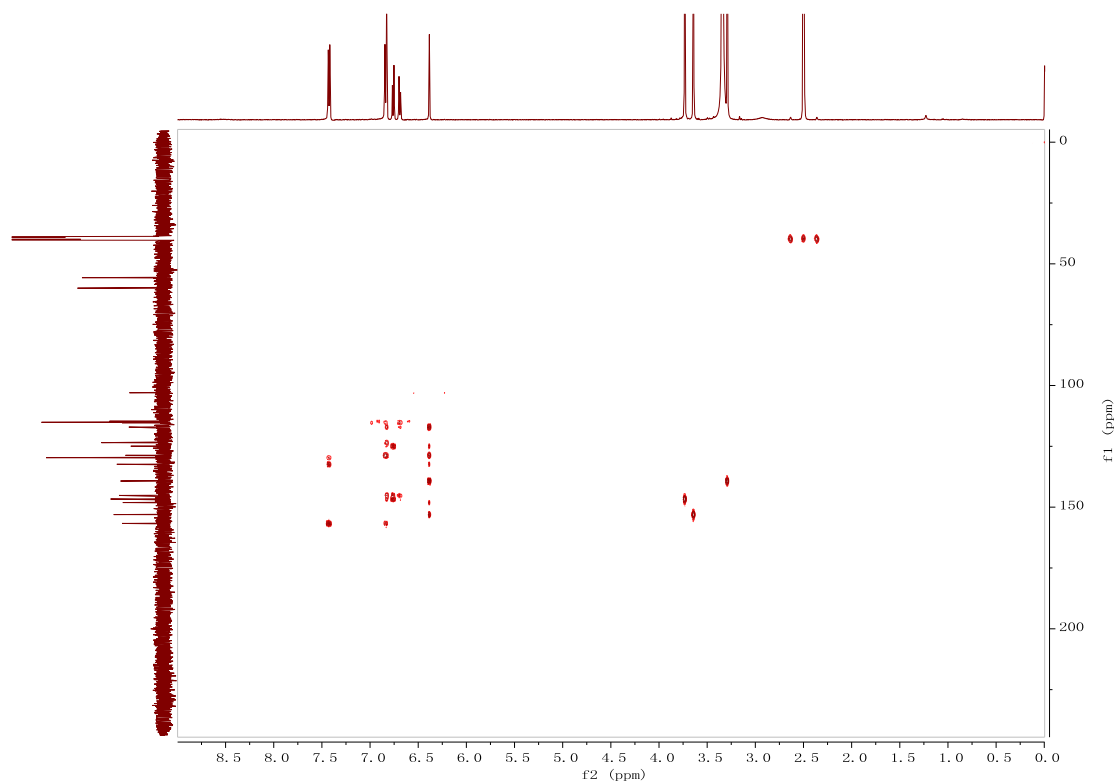

Figure S5. HMBC spectrum of compound **1**

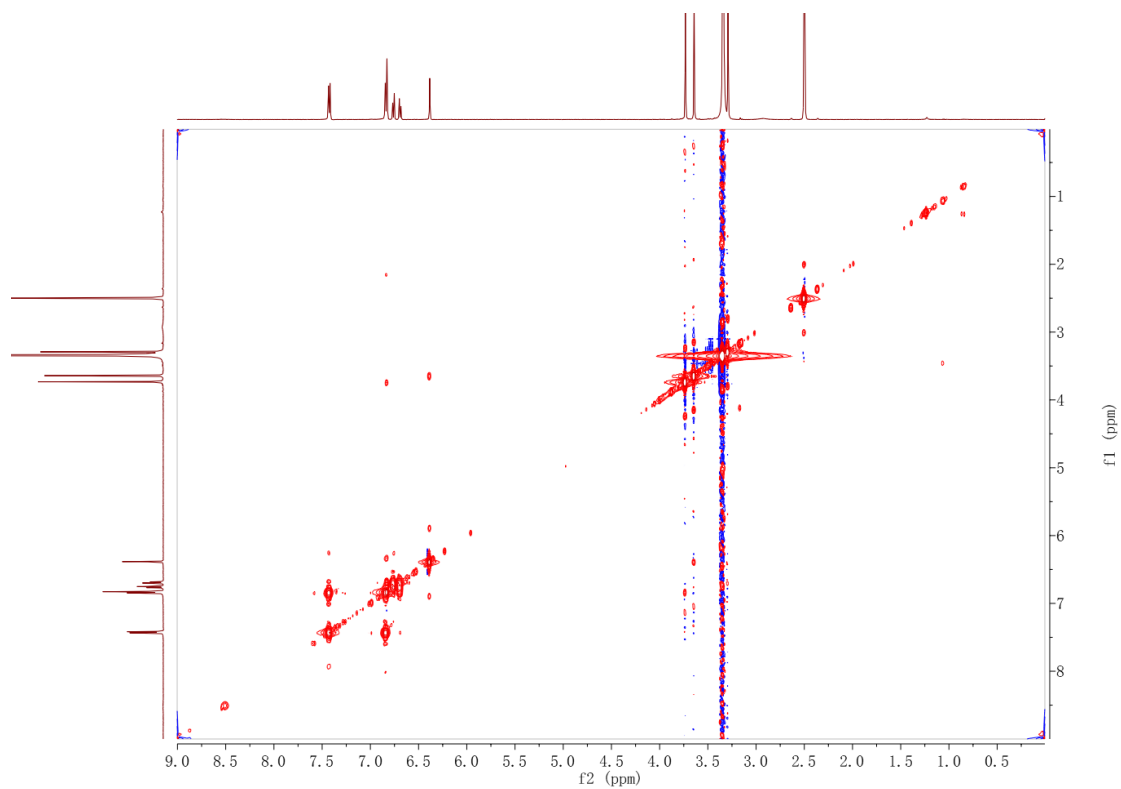

Figure S6.  $^1\text{H}$ - $^1\text{H}$  COSY spectrum of compound **1**

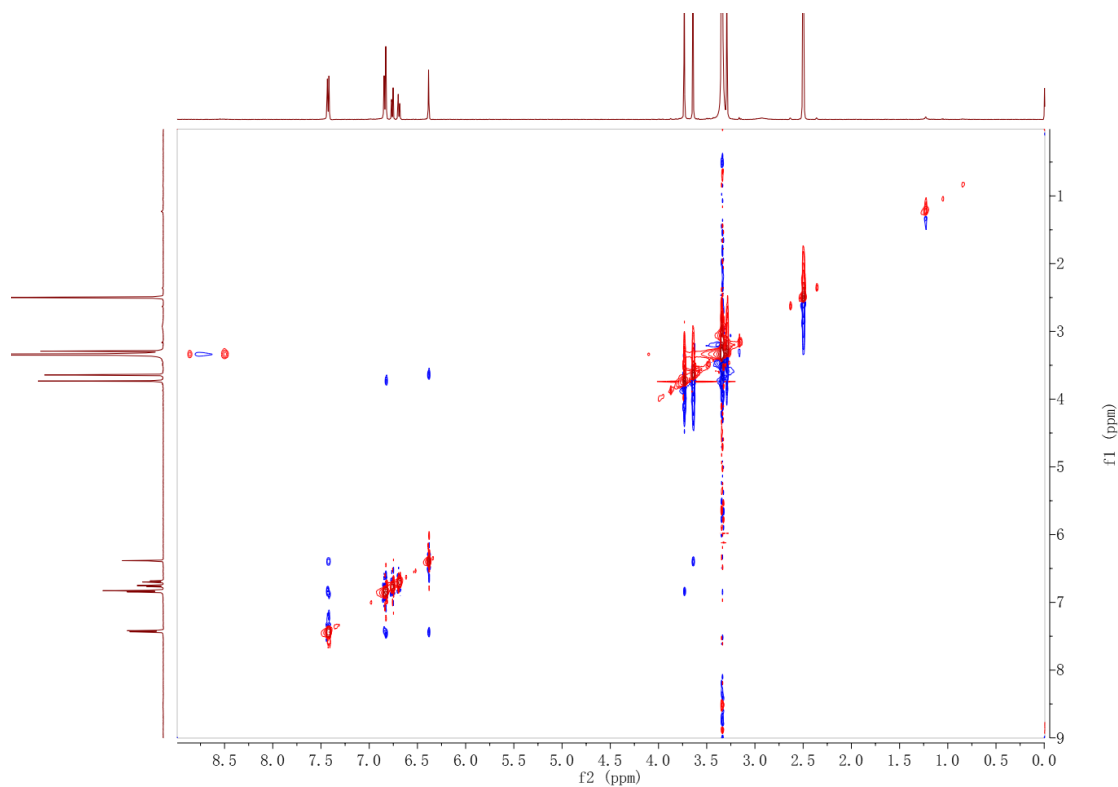

Figure S7. ROESY spectrum of compound **1**

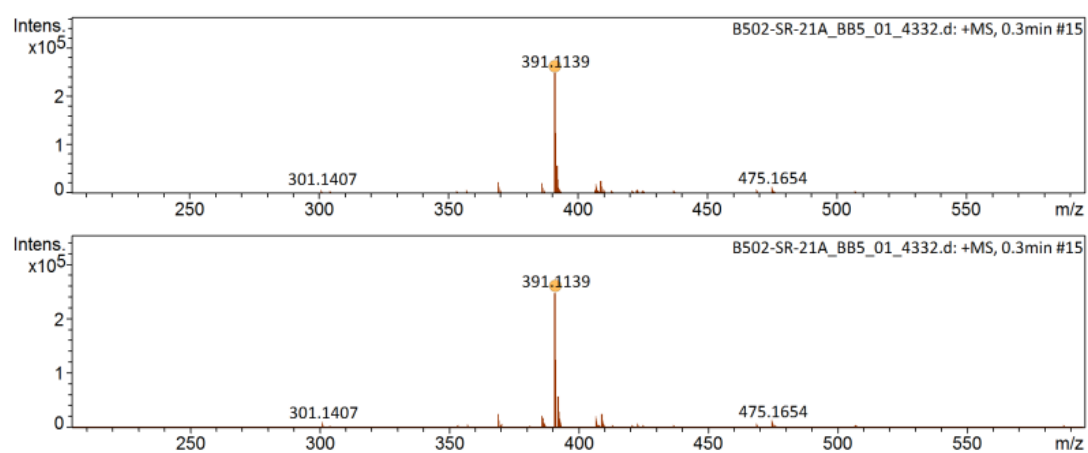

| Meas. m/z | # | Ion Formula                                      | m/z      | err [ppm] | mSigma | # mSigma | Score  | rdb  | e <sup>-</sup> Conf | N-Rule | Adduct |
|-----------|---|--------------------------------------------------|----------|-----------|--------|----------|--------|------|---------------------|--------|--------|
| 391.1139  | 1 | C <sub>21</sub> H <sub>20</sub> NaO <sub>6</sub> | 391.1152 | 3.4       | 2.7    | 1        | 100.00 | 12.0 | even                | ok     | M+Na   |

Figure S8. The HRESIMS spectrum of compound **1**

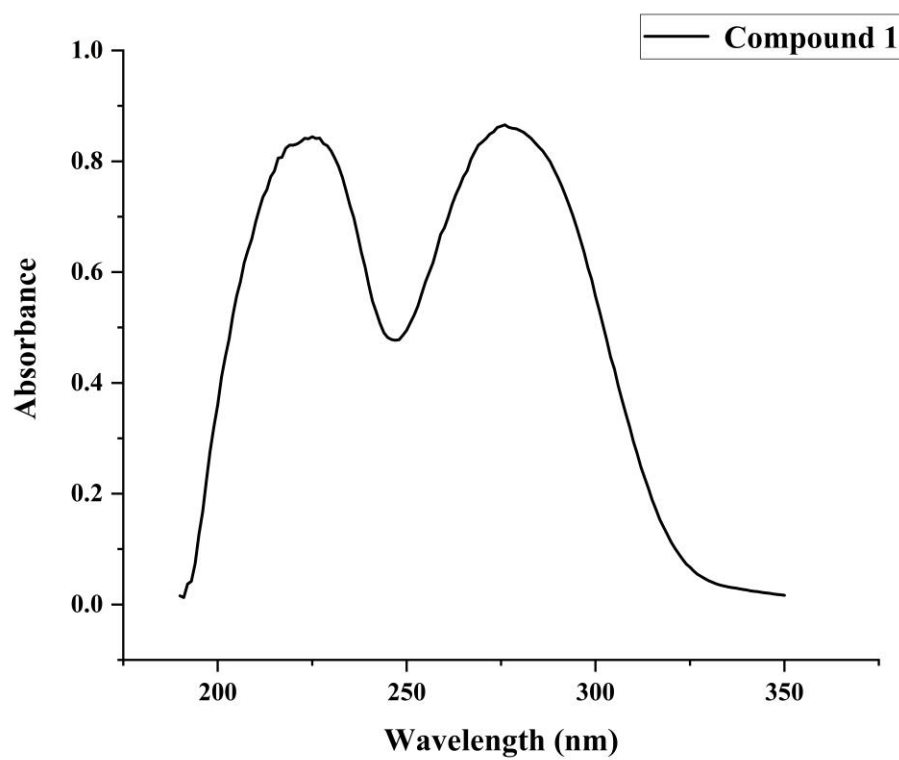

Figure S9. UV spectrum of compound **1**

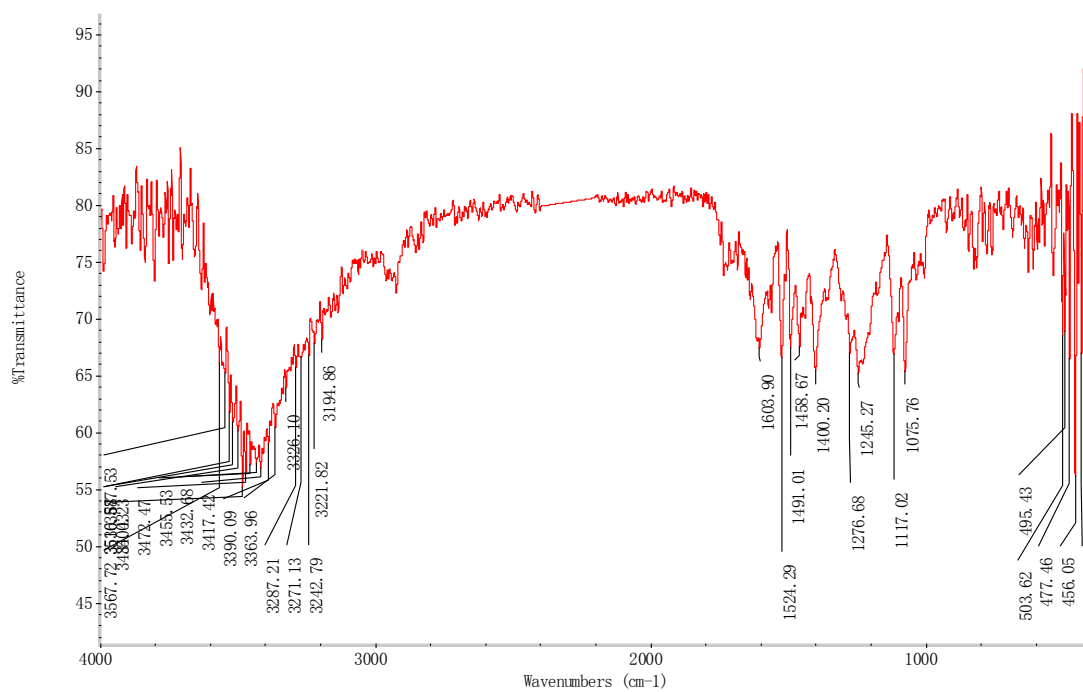

Figure S10. IR spectrum of compound **1**



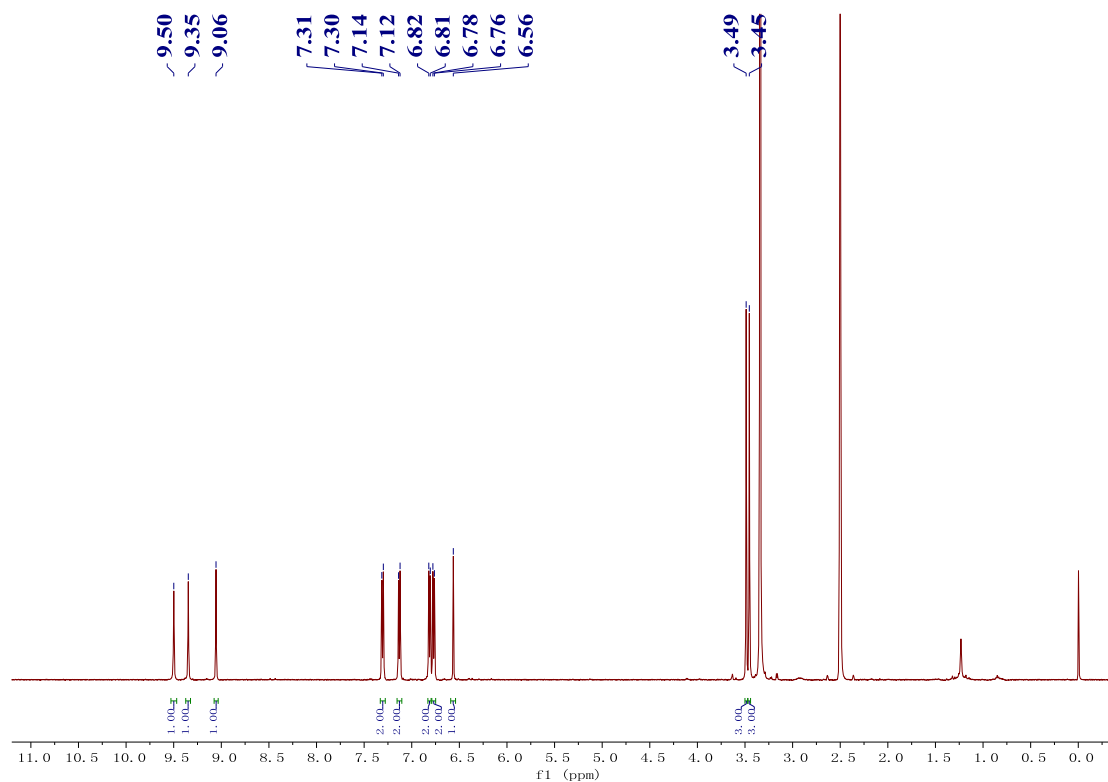

Figure S11. <sup>1</sup>H NMR (500 MHz, DMSO-*d*<sub>6</sub>) spectrum of compound **2**

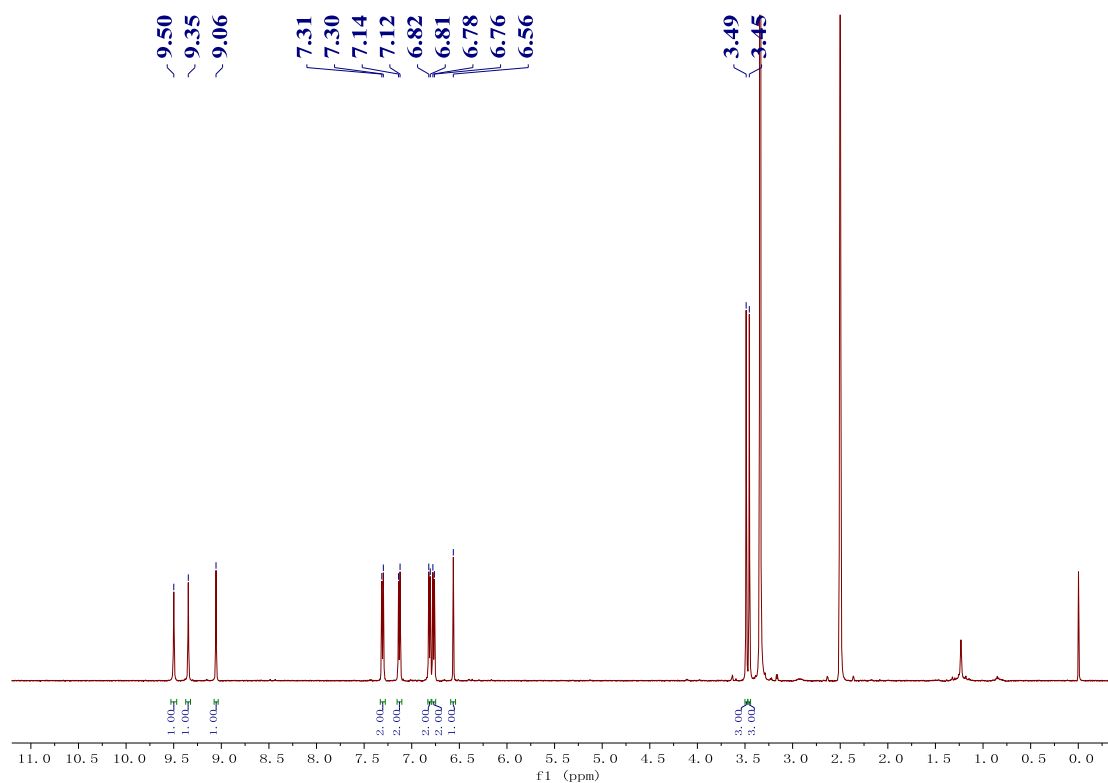

Figure S12. <sup>13</sup>C NMR (125 MHz, DMSO-*d*<sub>6</sub>) spectrum of compound **2**

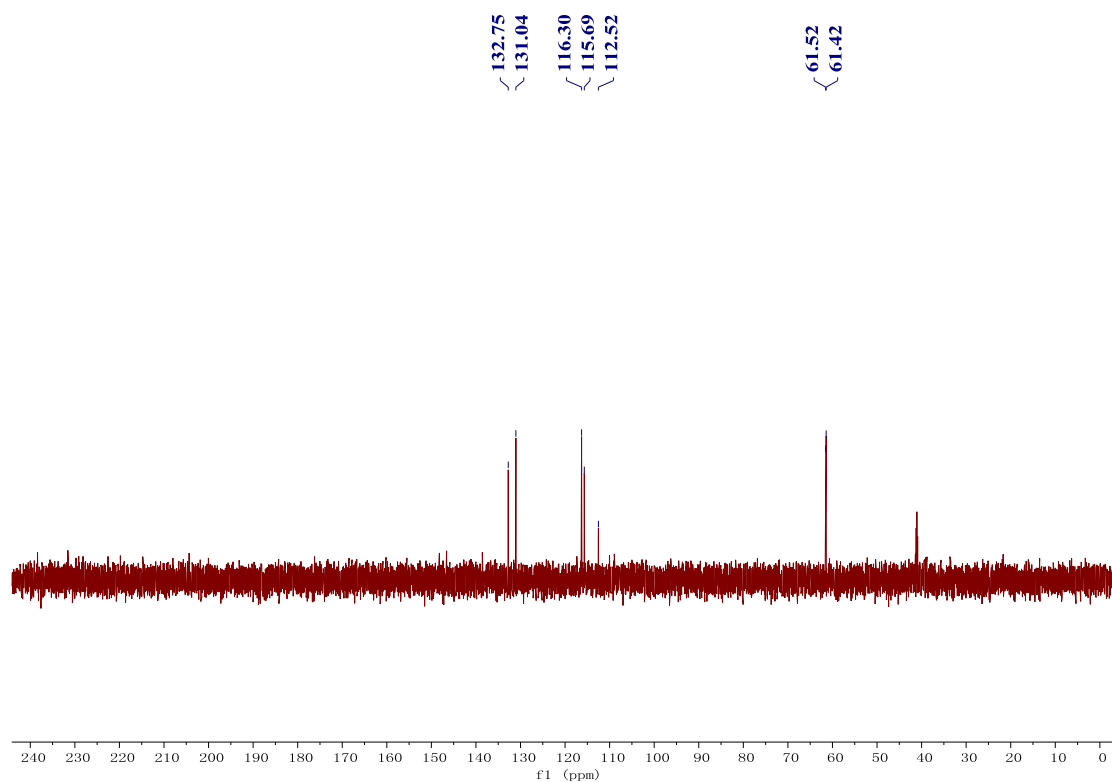

Figure S13. DEPT135 spectrum of compound 2

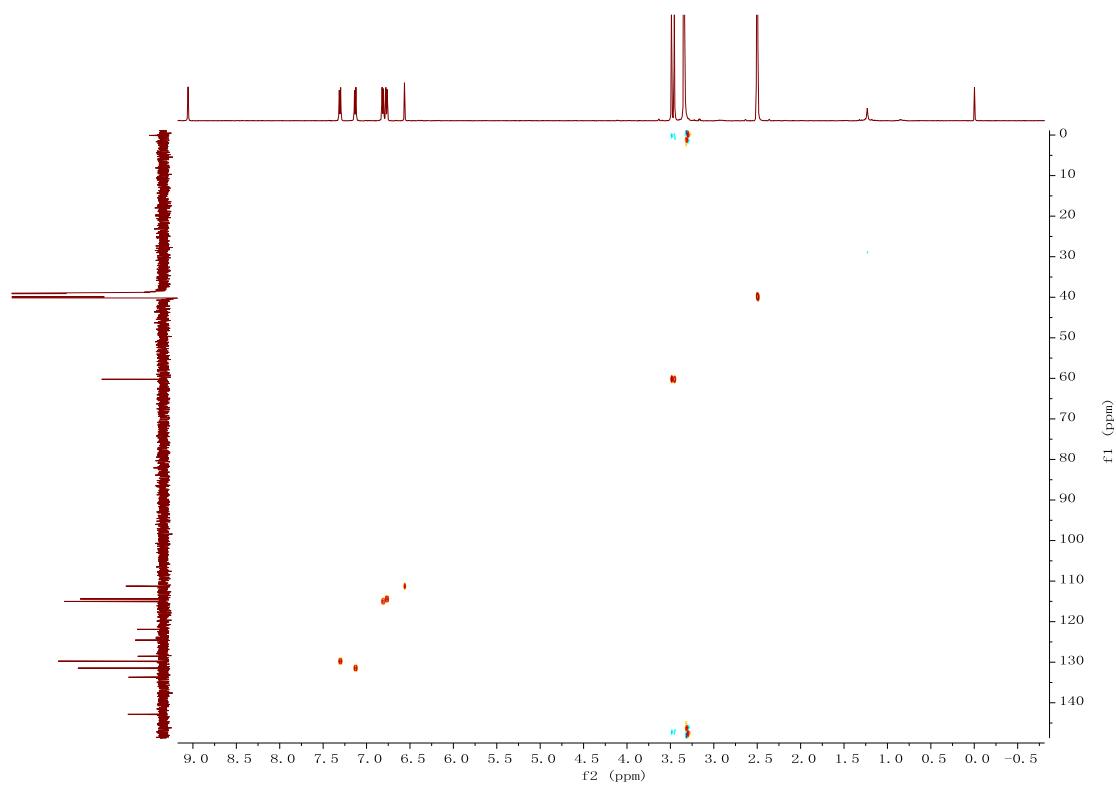

Figure S14. HSQC spectrum of compound 2

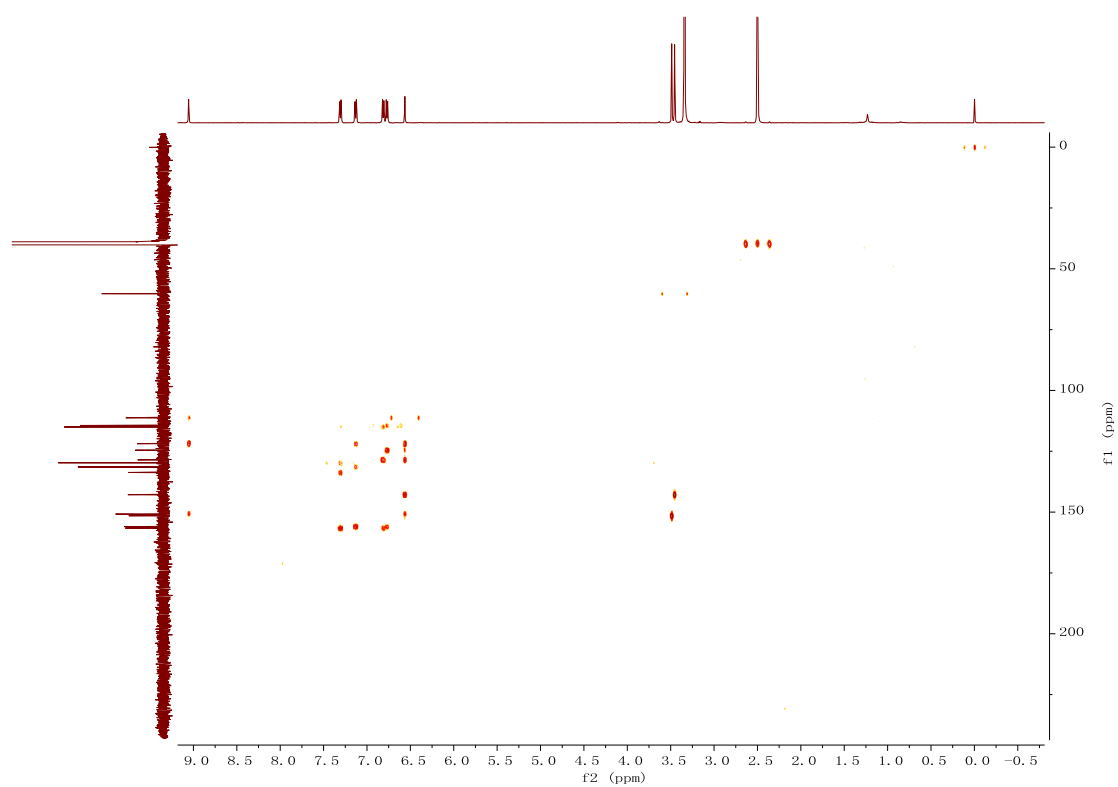

Figure S15. HMBC spectrum of compound **2**

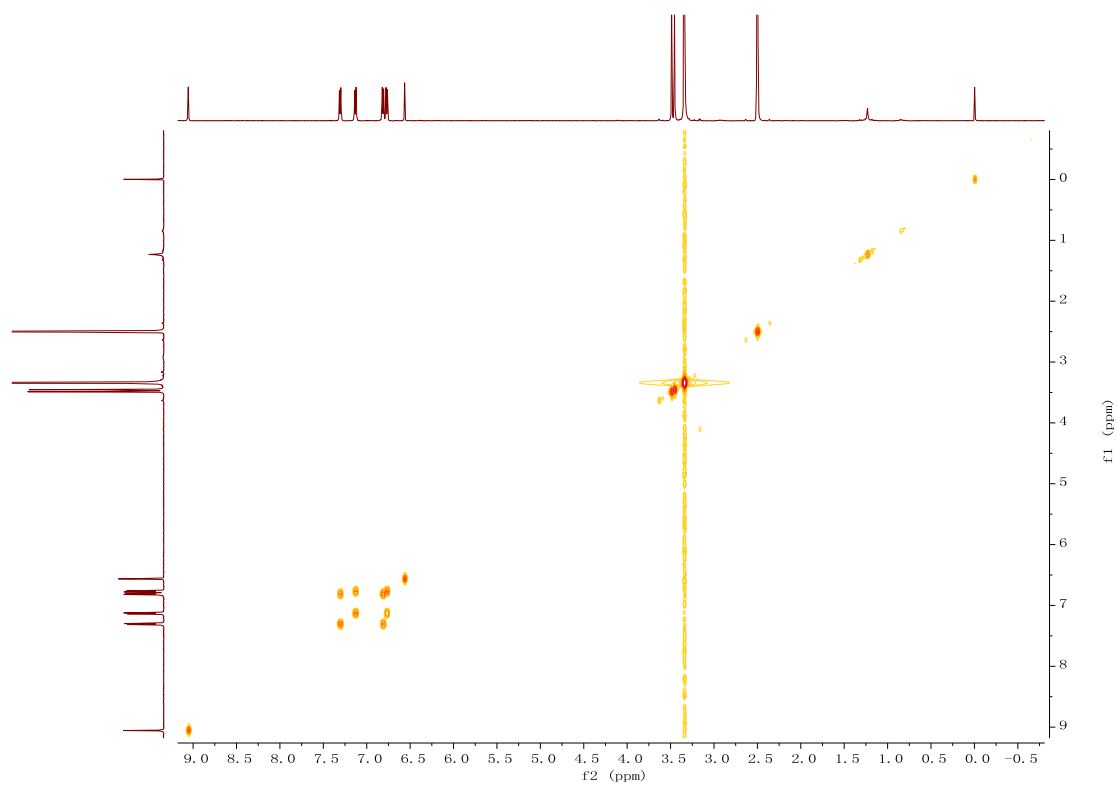

Figure S16.  $^1\text{H}$ - $^1\text{H}$  COSY spectrum of compound **2**

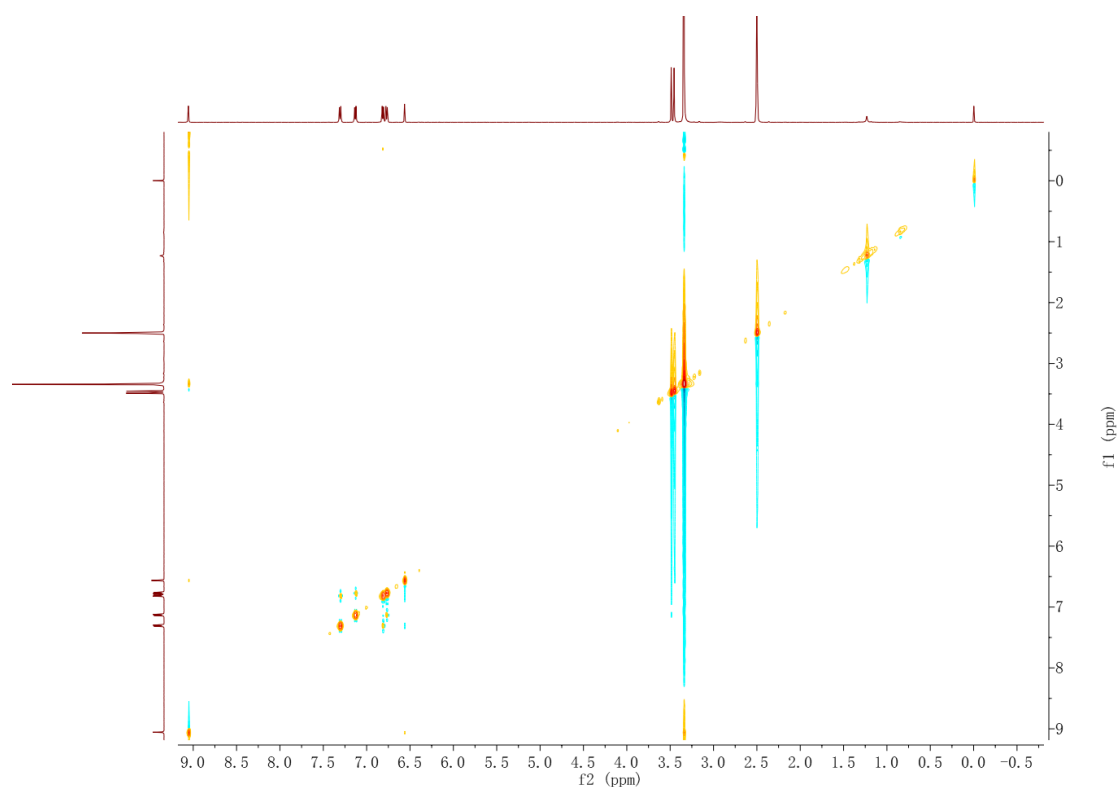

Figure S17. ROESY spectrum of compound **2**

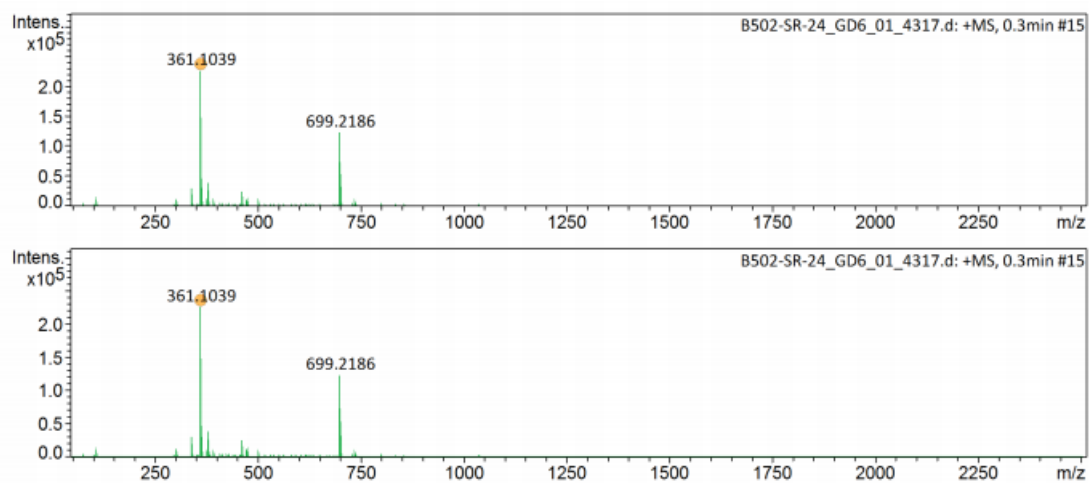

| Meas. m/z | # | Ion Formula                                      | m/z      | err [ppm] | mSigma | # mSigma | Score  | rdb  | e <sup>-</sup> Conf | N-Rule | Adduct |
|-----------|---|--------------------------------------------------|----------|-----------|--------|----------|--------|------|---------------------|--------|--------|
| 361.1039  | 1 | C <sub>20</sub> H <sub>18</sub> NaO <sub>5</sub> | 361.1046 | 2.2       | 7.4    | 1        | 100.00 | 12.0 | even                | ok     | M+Na   |

Figure S18. The HRESIMS spectrum of compound **2**

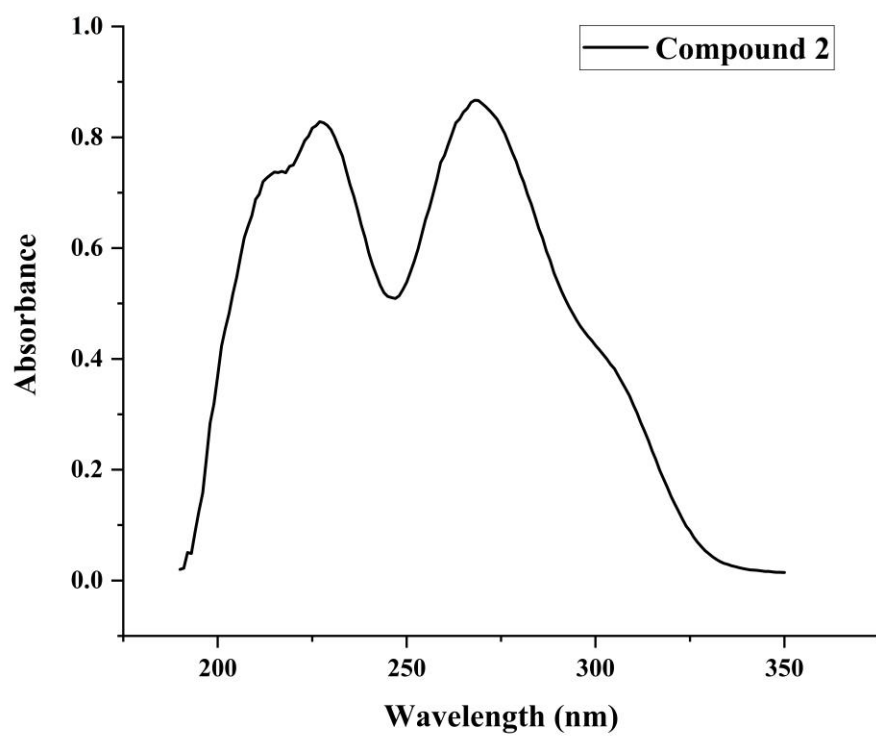

Figure S19. UV spectrum of compound 2

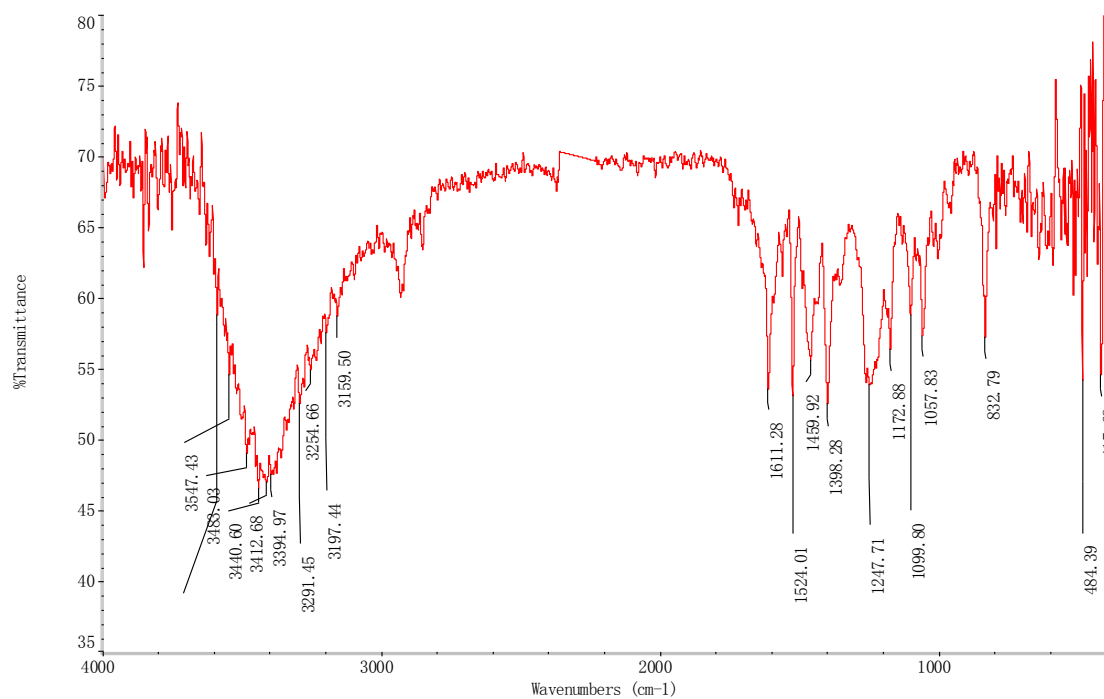

Figure S20. IR spectrum of compound 2

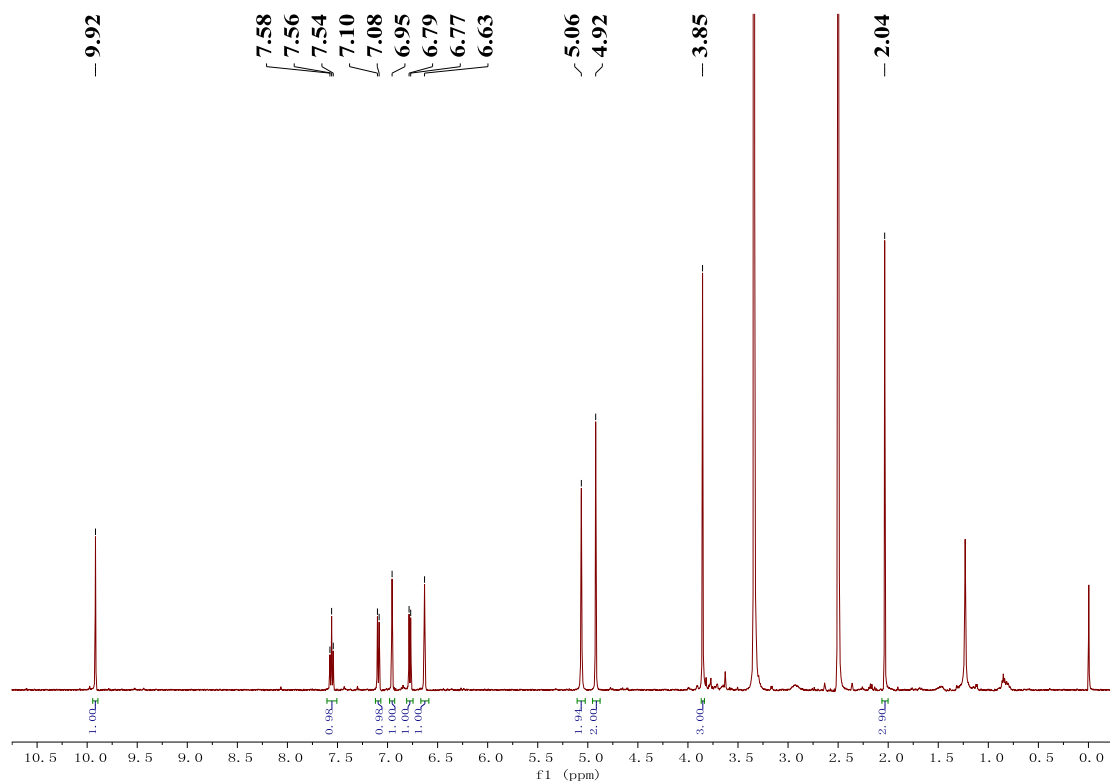

Figure S21. <sup>1</sup>H NMR (500 MHz, DMSO-*d*<sub>6</sub>) spectrum of compound **3**

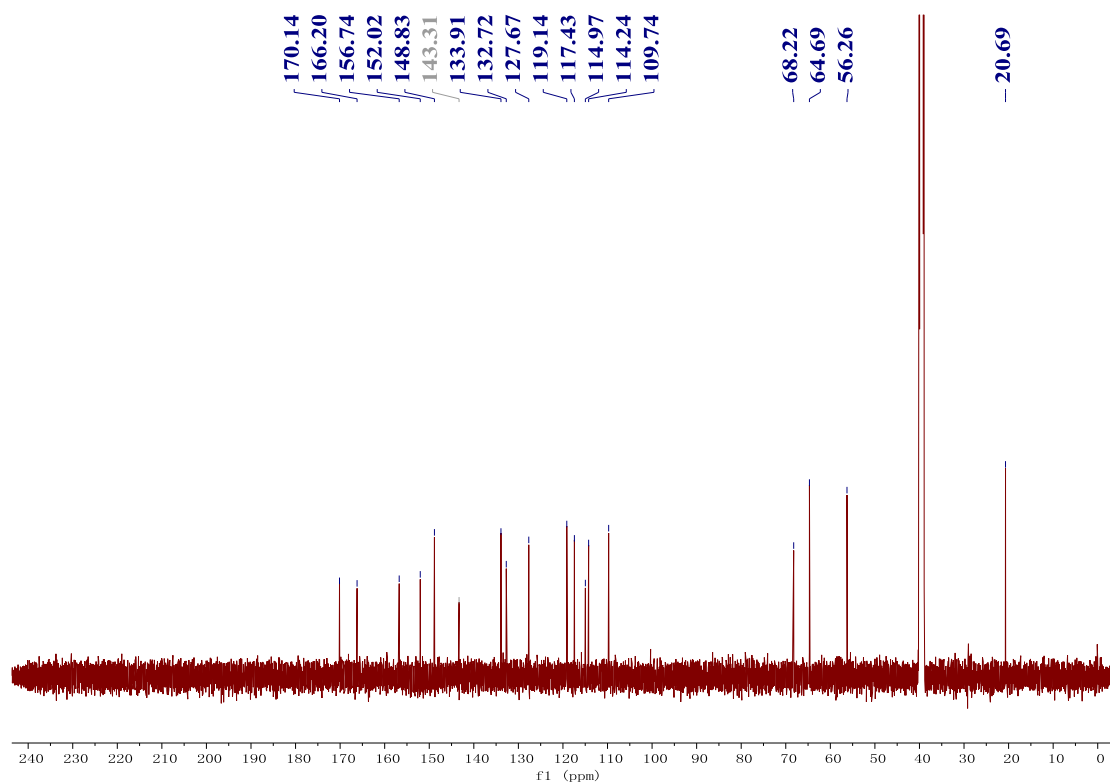

Figure S22. <sup>13</sup>C NMR (125 MHz, DMSO-*d*<sub>6</sub>) spectrum of compound **3**

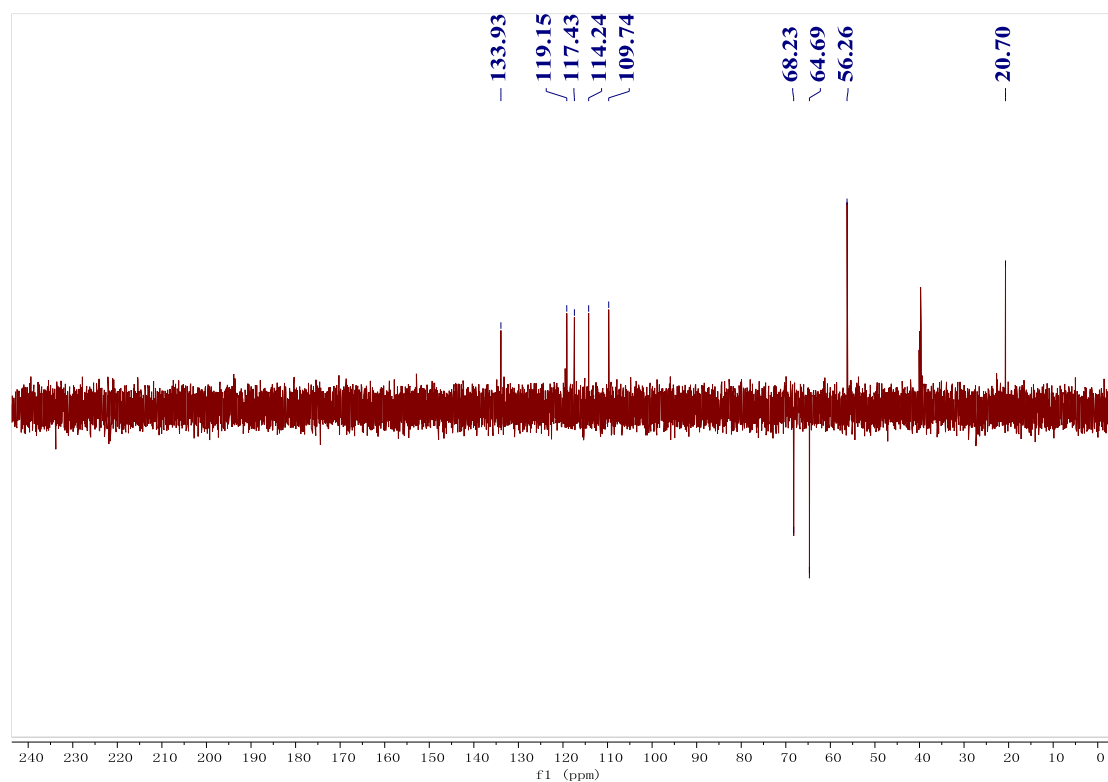

Figure S23. DEPT135 spectrum of compound **3**

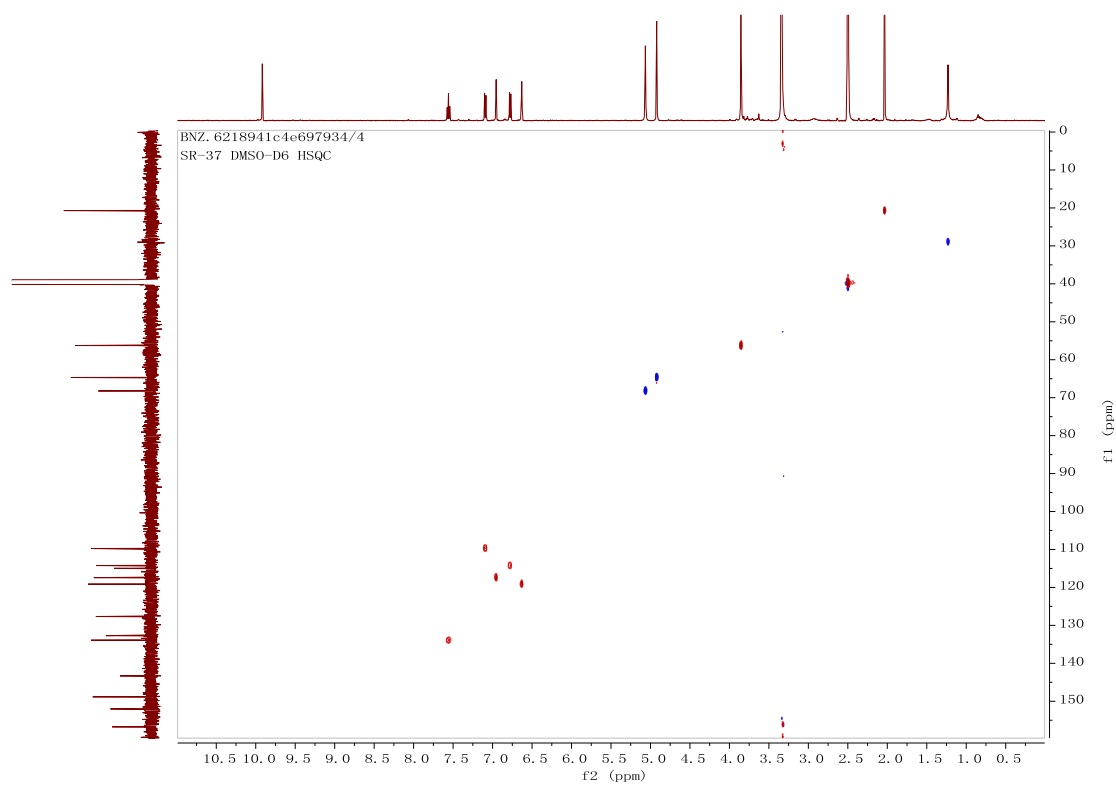

Figure S24. HSQC spectrum of compound **3**

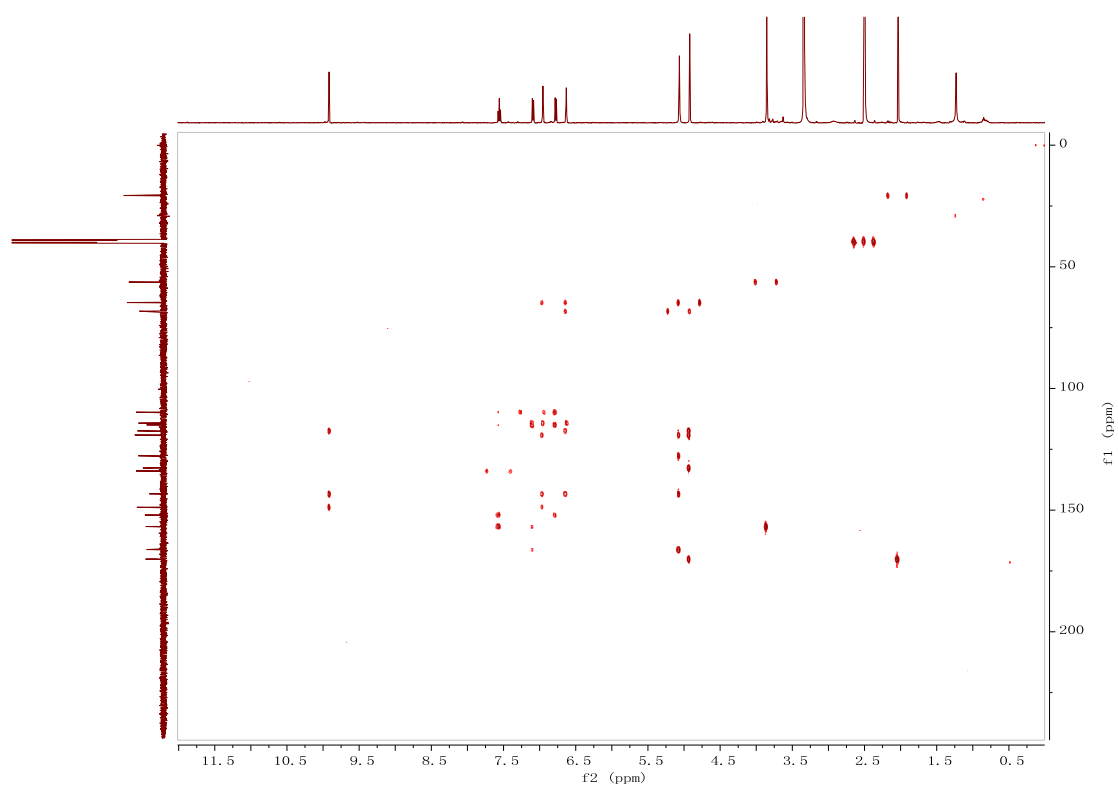

Figure S25. HMBC spectrum of compound **3**

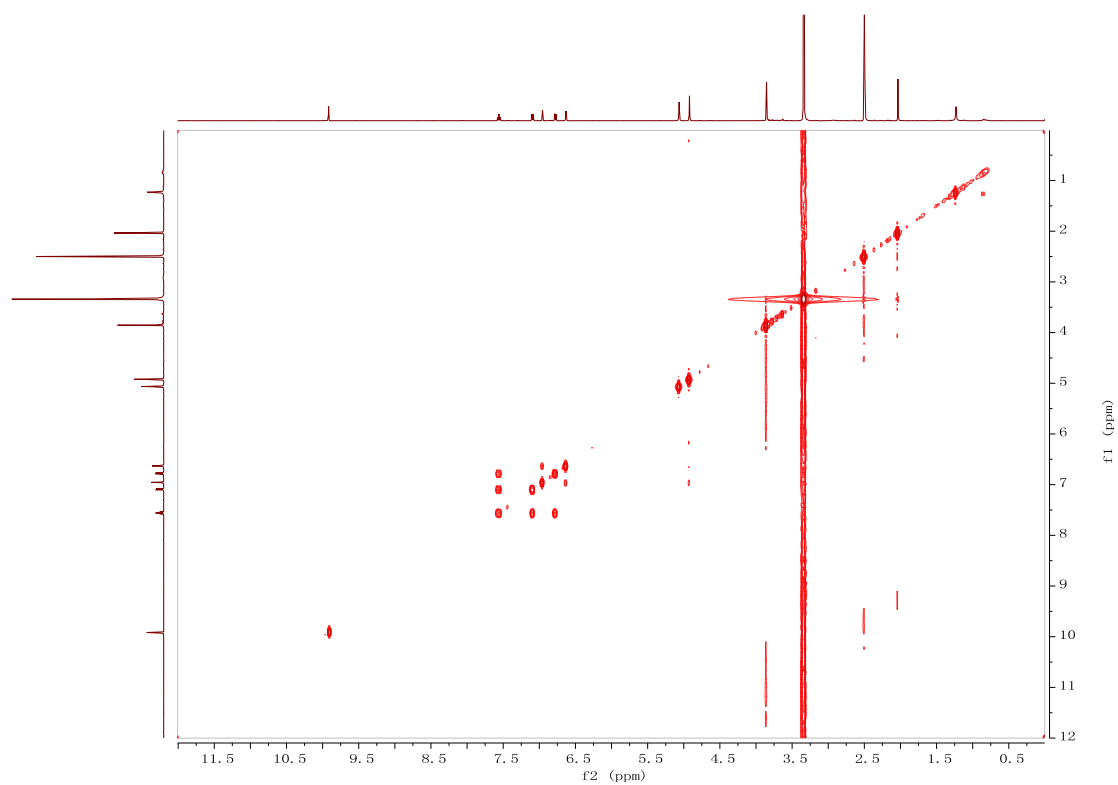

Figure S26.  $^1\text{H}$ - $^1\text{H}$  COSY spectrum of compound **3**



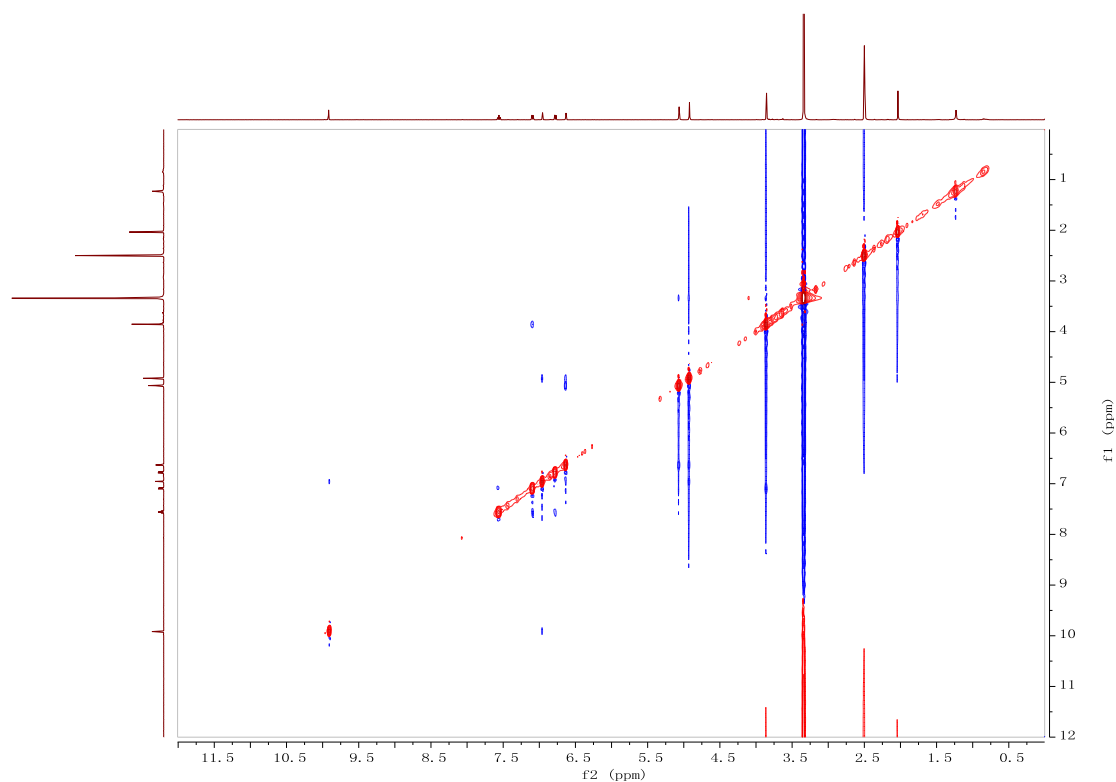

Figure S27. ROESY spectrum of compound **3**

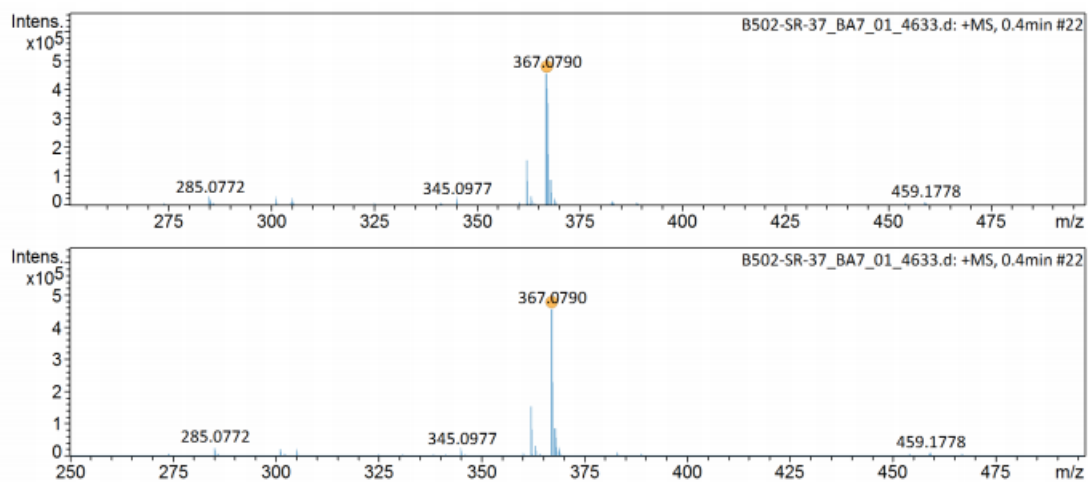

| Meas. m/z | # | Ion Formula                                      | m/z      | err [ppm] | mSigma | # mSigma | Score  | rdb  | e <sup>-</sup> Conf | N-Rule | Adduct |
|-----------|---|--------------------------------------------------|----------|-----------|--------|----------|--------|------|---------------------|--------|--------|
| 367.0790  | 1 | C <sub>18</sub> H <sub>16</sub> NaO <sub>7</sub> | 367.0788 | -0.4      | 5.1    | 1        | 100.00 | 11.0 | even                | ok     | M+Na   |

Figure S28. The HRESIMS spectrum of compound **3**

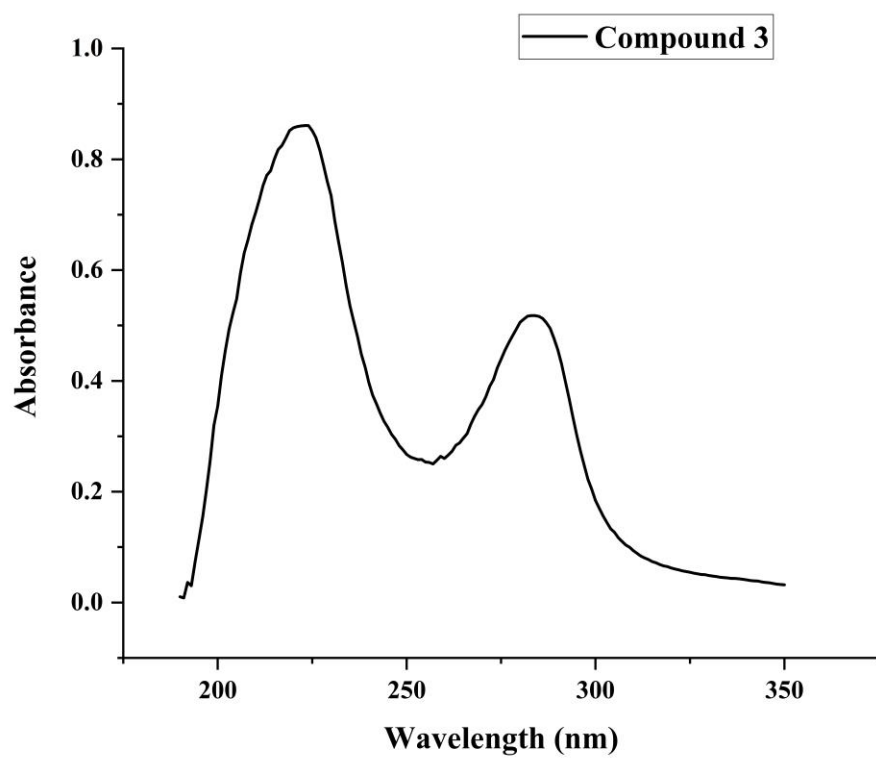

Figure S29. UV spectrum of compound 3

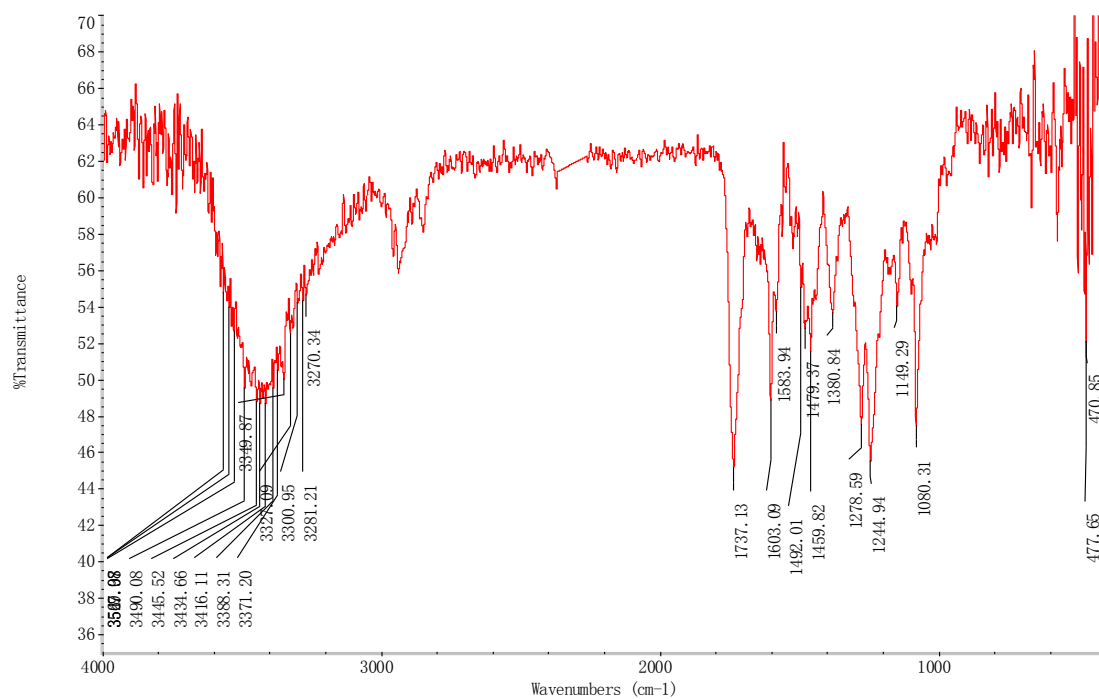

Figure S30. IR spectrum of compound 3

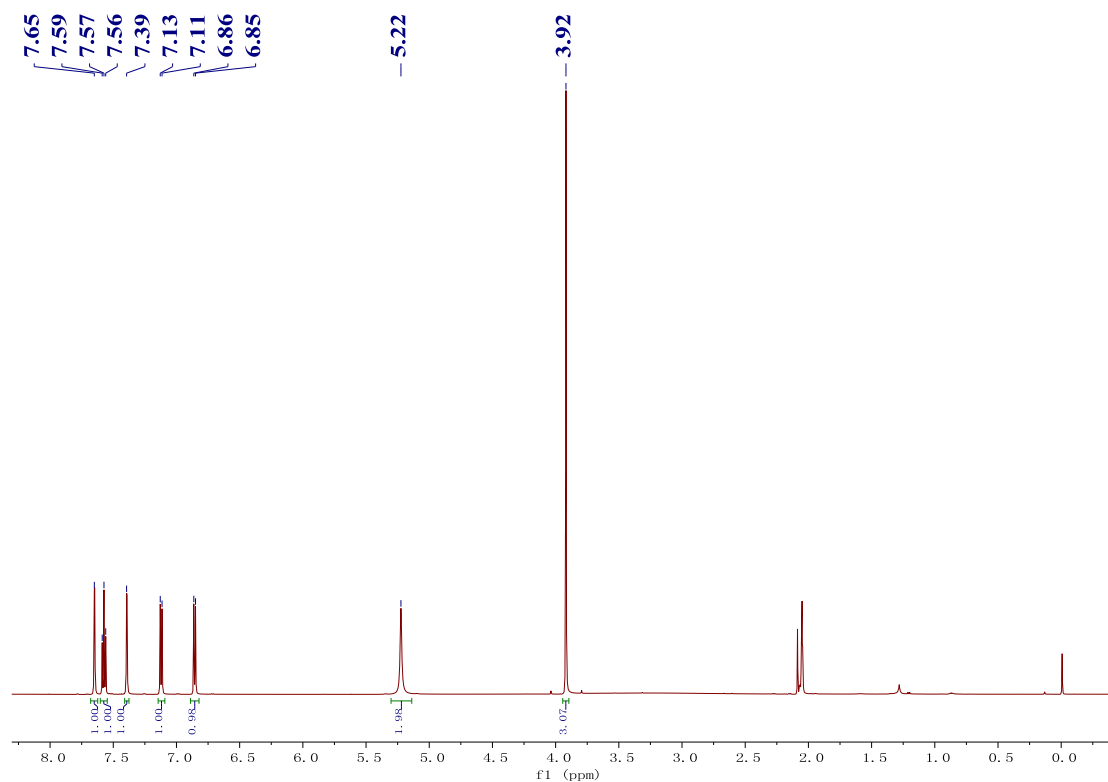

Figure S31. <sup>1</sup>H NMR (600 MHz, acetone-*d*<sub>6</sub>) spectrum of compound **4**

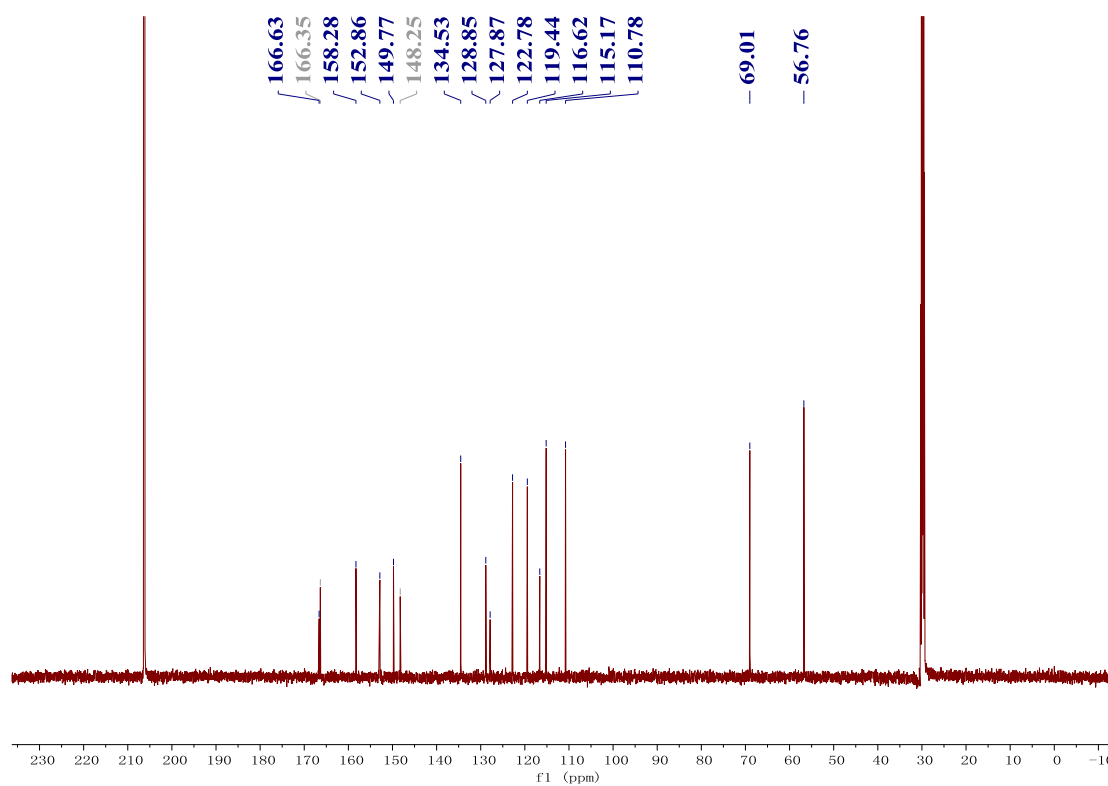

Figure S32. <sup>13</sup>C NMR (150 MHz, acetone-*d*<sub>6</sub>) spectrum of compound **4**

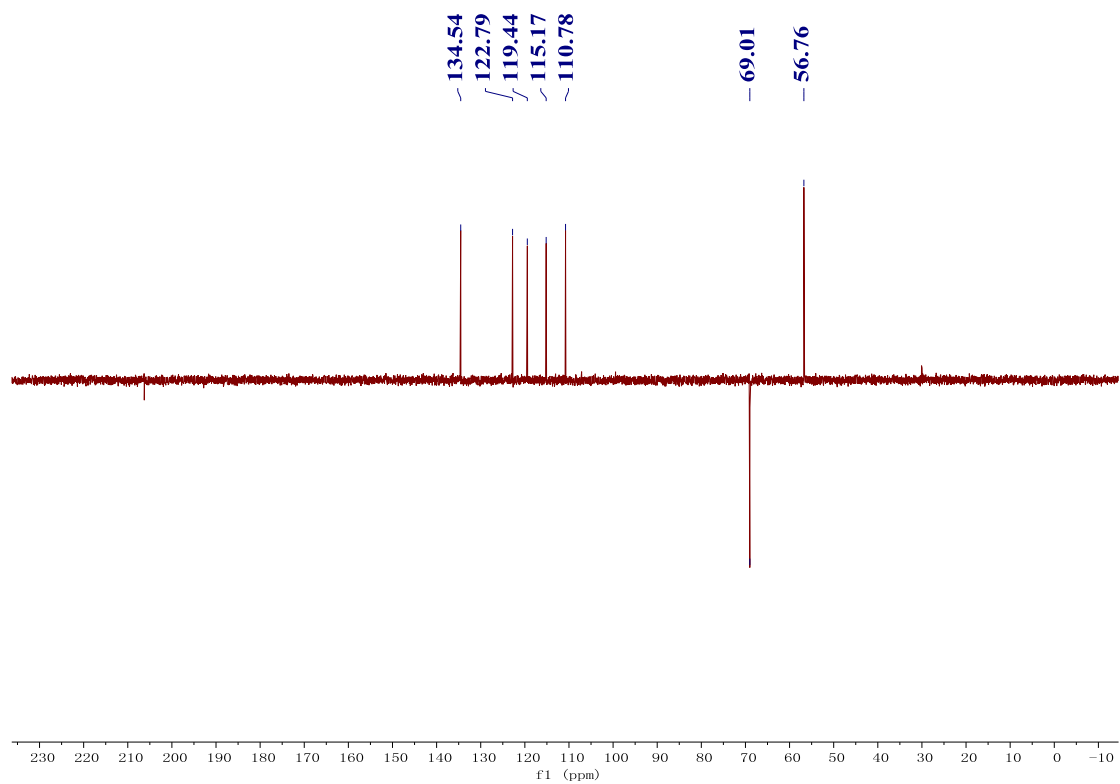

Figure S33. DEPT135 spectrum of compound **4**

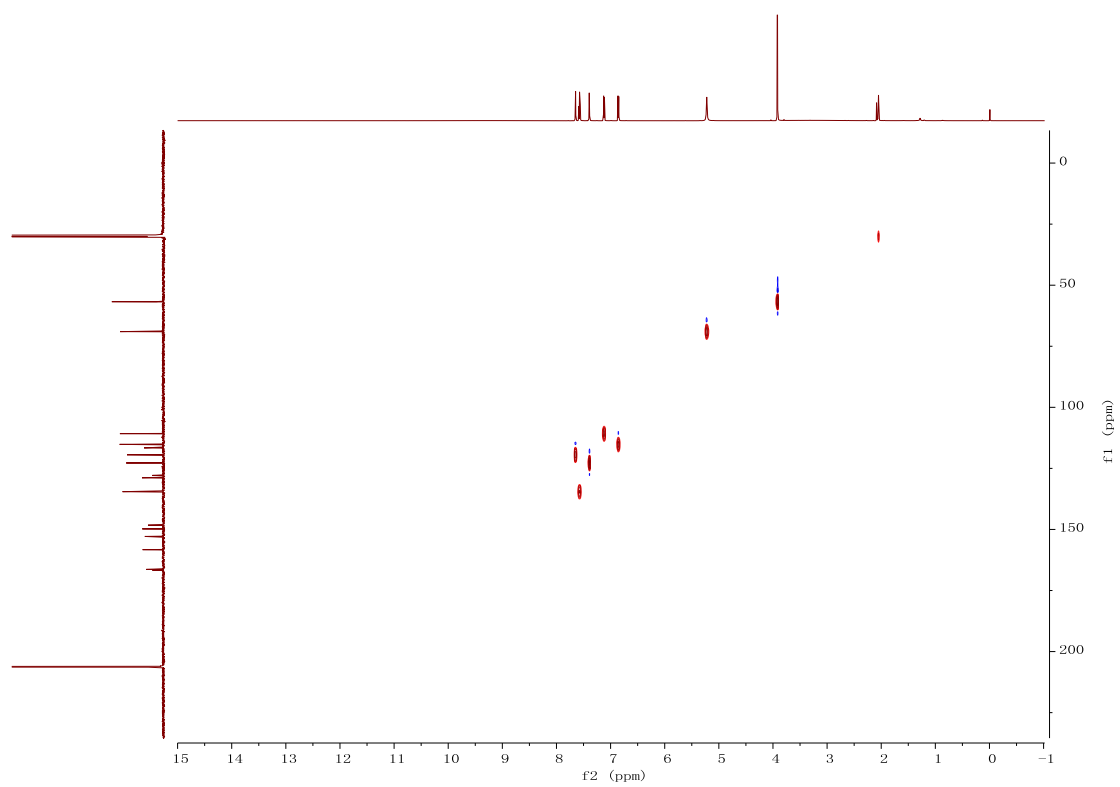

Figure S34. HSQC spectrum of compound **4**

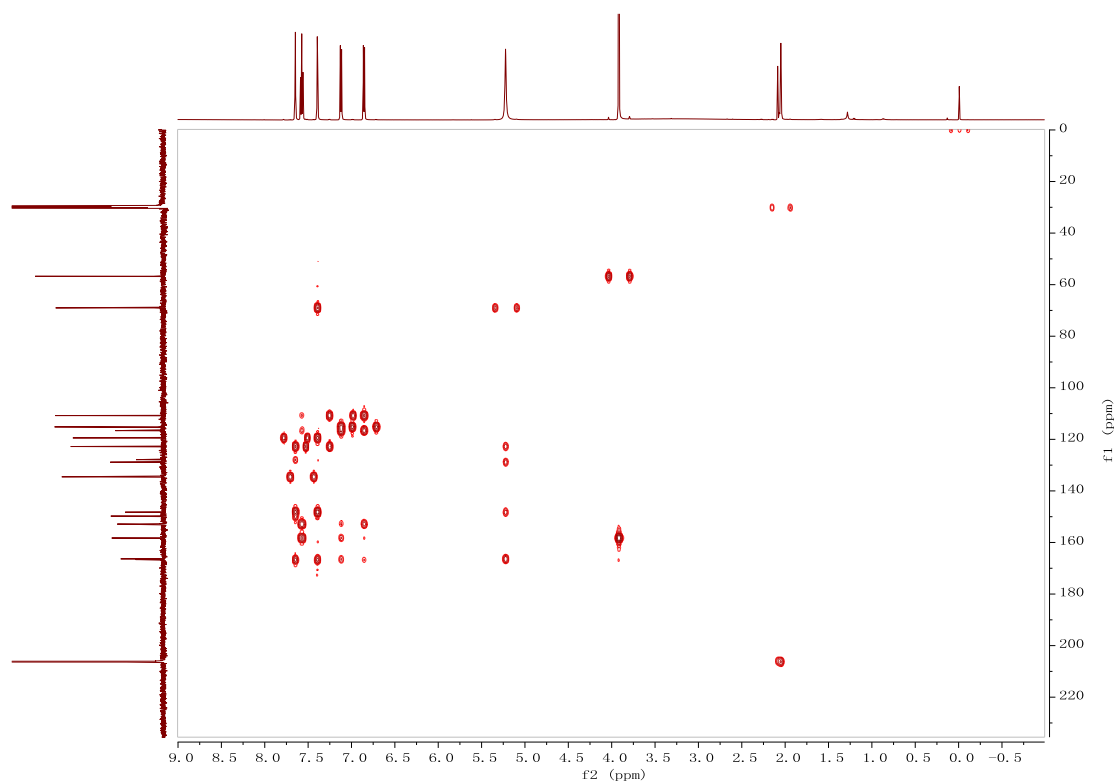

Figure S35. HMBC spectrum of compound **4**

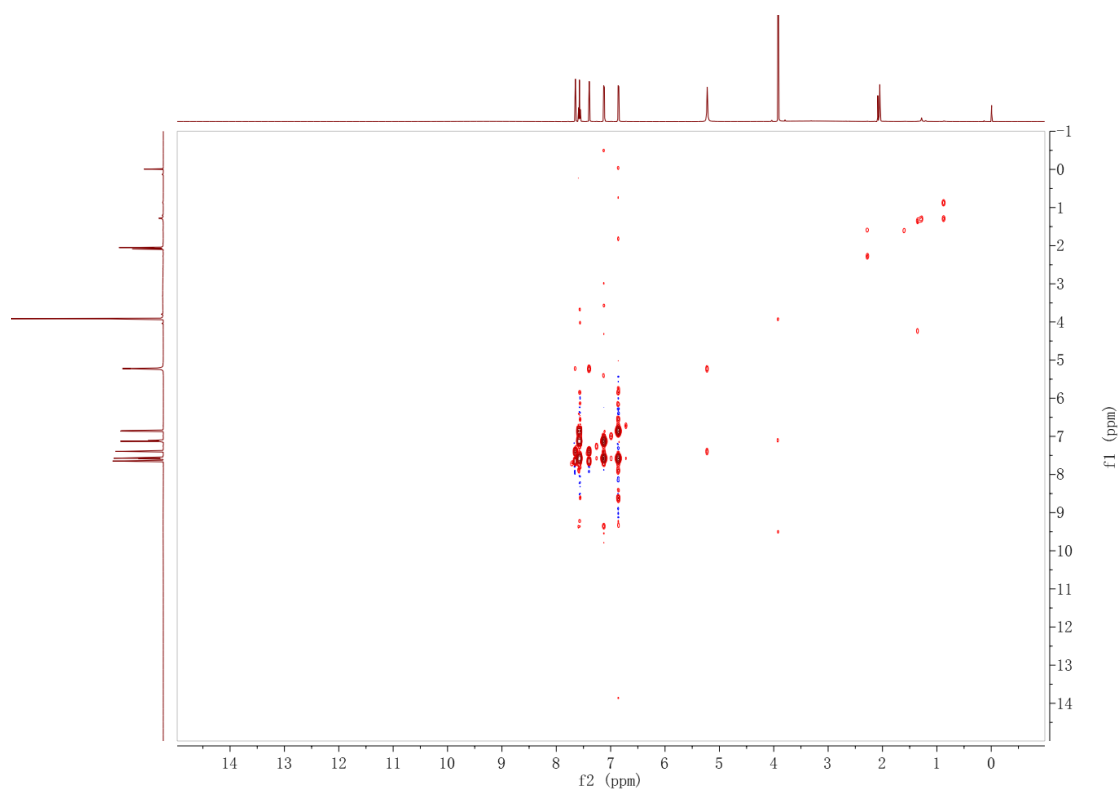

Figure S36.  $^1\text{H}$ - $^1\text{H}$  COSY spectrum of compound **4**

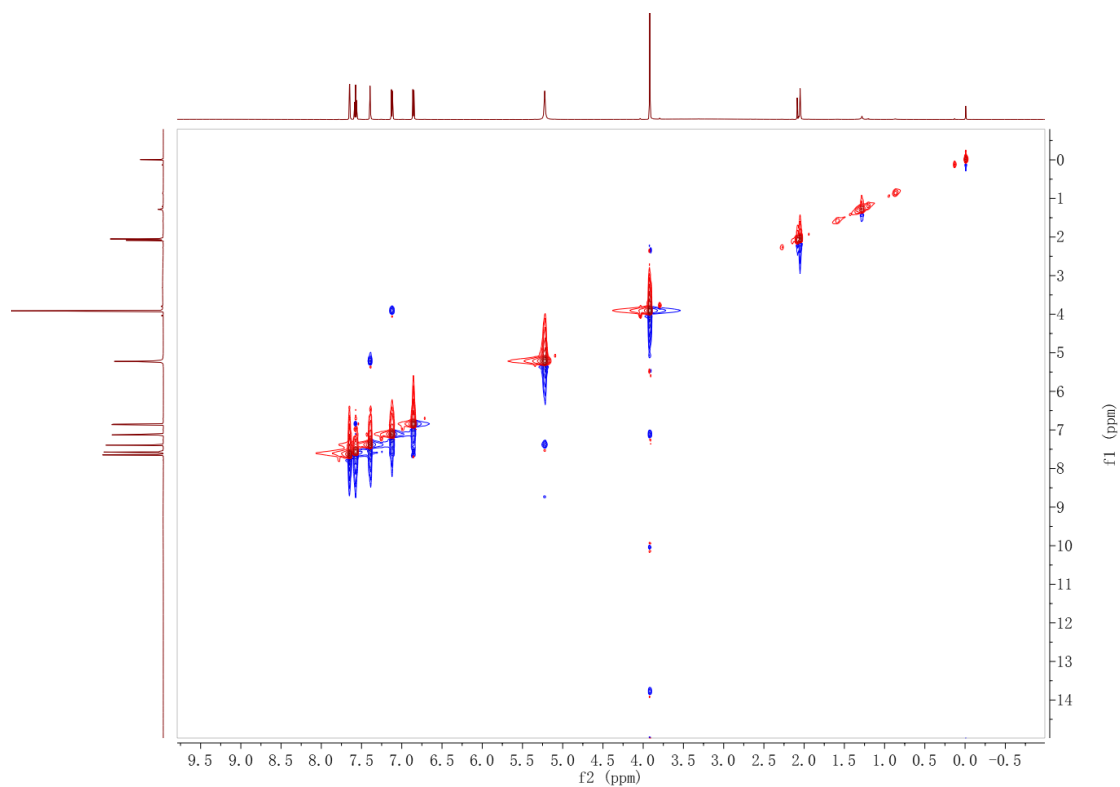

Figure S37. ROESY spectrum of compound **4**

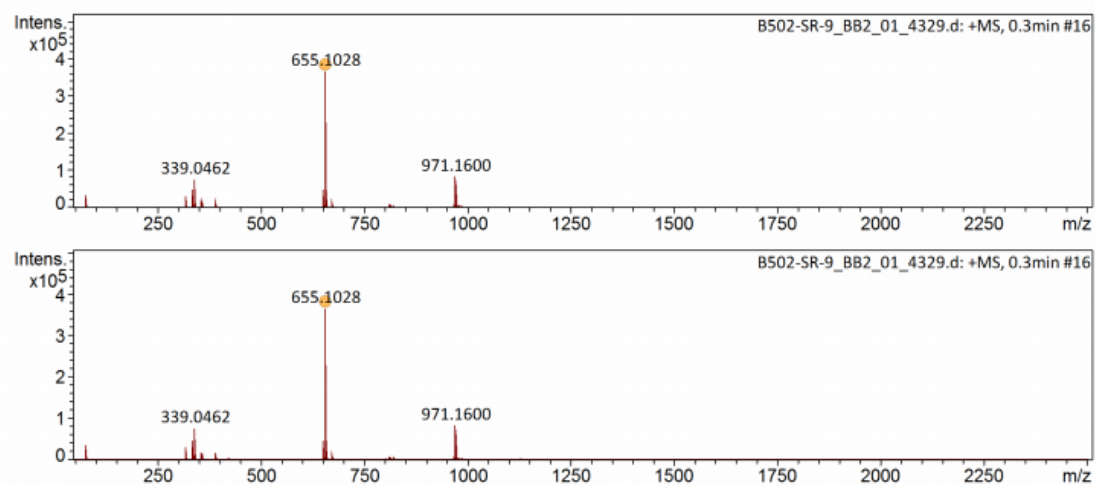

| Meas. m/z | # | Ion Formula                                       | m/z      | err [ppm] | mSigma | # mSigma | Score  | rdb  | e <sup>-</sup> Conf | N-Rule | Adduct |
|-----------|---|---------------------------------------------------|----------|-----------|--------|----------|--------|------|---------------------|--------|--------|
| 655.1028  | 1 | C <sub>32</sub> H <sub>24</sub> NaO <sub>14</sub> | 655.1058 | 4.6       | 2.9    | 1        | 100.00 | 21.0 | even                | ok     | 2M+Na  |

Figure S38. The HRESIMS spectrum of compound **4**

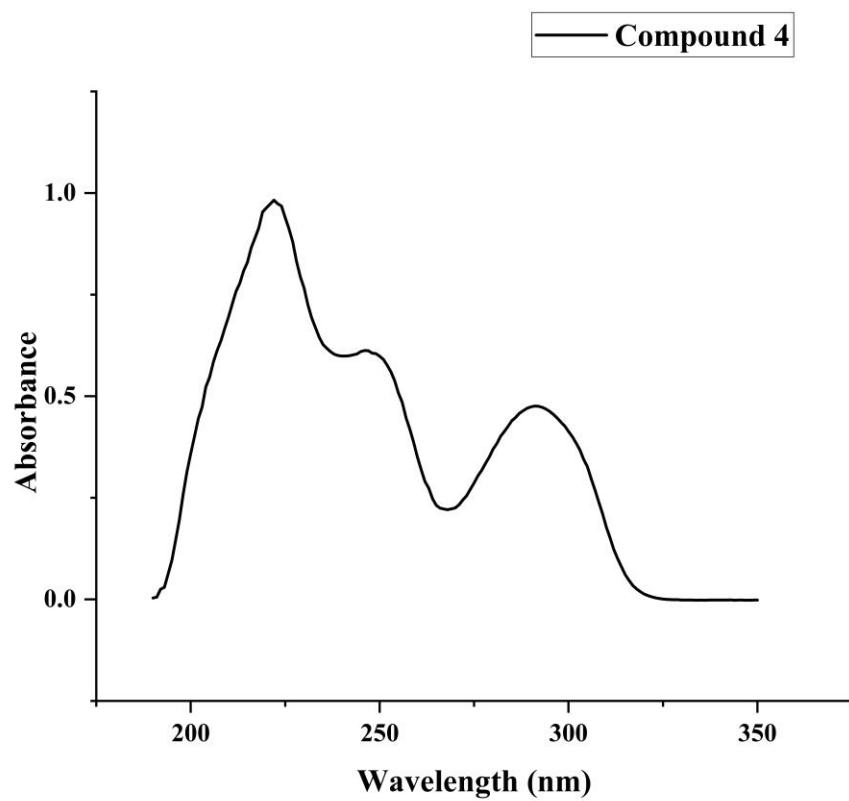

Figure S39. UV spectrum of compound 4

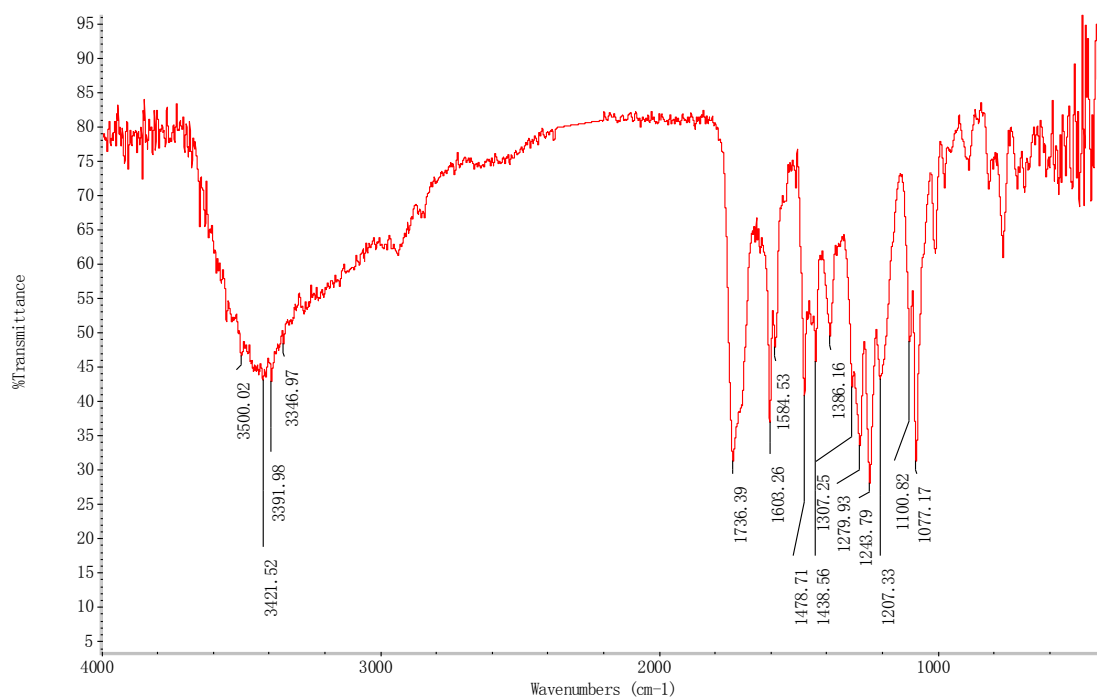

Figure S40. IR spectrum of compound 4
